# Supplementary material for: Neuroprotective azaphilones from a deep-sea derived fungus Penicillium sp. SCSIO41030
Source: Royal Society of Chemistry journal article supplement (doi:10.1039/d4ob00586d), 2024-01-01
Supplement: d4ob00586d1.pdf [file d4ob00586d1.pdf]

## Supporting Information

### Neuroprotective azaphilones from a deep-sea derived fungus *Penicillium* sp. SCSIO41030

Weihaio Chen<sup>a,c,#</sup>, Jiahui Jiang<sup>b,#</sup>, Xiaoyan Pang<sup>a</sup>, Yingying Song<sup>a,c</sup>, Zhiyou Yang<sup>b,\*</sup>, Junfeng Wang<sup>a,c,d,\*</sup>, Yonghong Liu<sup>a,c,d,\*</sup>

<sup>a</sup> CAS Key Laboratory of Tropical Marine Bio-resources and Ecology/Guangdong Key Laboratory of Marine Materia Medica/ Innovation Academy of South China Sea Ecology and Environmental Engineering, South China Sea Institute of Oceanology, Chinese Academy of Sciences, Guangzhou 510301, China

<sup>b</sup> College of Food Science and Technology, Guangdong Provincial Key Laboratory of Aquatic Product Processing and Safety, Guangdong Province Engineering Laboratory for Marine Biological Products, Guangdong Provincial Engineering Technology Research Center of Seafood, Key Laboratory of Advanced Processing of Aquatic Product of Guangdong Higher Education Institution, Guangdong Ocean University, Zhanjiang 524088, China

<sup>c</sup> University of Chinese Academy of Sciences, 19 Yuquan Road, Beijing 100049, China

<sup>d</sup> Sanya Institute of Marine Ecology and Engineering, Yazhou Scientific Bay, Sanya 572000, China

## List of supporting information

|                                                                                                           |  |
|-----------------------------------------------------------------------------------------------------------|--|
| Figure S1. The $^{13}\text{C}$ NMR spectrum of P1 in Chloroform- <i>d</i> and its chiral HPLC profile. .4 |  |
| Figure S2. The $^1\text{H}$ NMR spectrum of 1 in Chloroform- <i>d</i> .....4                              |  |
| Figure S3. The $^{13}\text{C}$ NMR spectrum of 1 in Chloroform- <i>d</i> .....5                           |  |
| Figure S4. The HSQC spectrum of 1 in Chloroform- <i>d</i> .....5                                          |  |
| Figure S5. The HMBC spectrum of 1 in Chloroform- <i>d</i> .....6                                          |  |
| Figure S6. The COSY spectrum of 1 in Chloroform- <i>d</i> .....6                                          |  |
| Figure S7. The UV spectrum of 1 in MeOH.....7                                                             |  |
| Figure S8. The IR spectrum of 1 .....7                                                                    |  |
| Figure S9. The HRESIMS spectrum of 1 .....8                                                               |  |
| Figure S10. The $^1\text{H}$ NMR spectrum of 2 in Chloroform- <i>d</i> .....8                             |  |
| Figure S11. The $^{13}\text{C}$ NMR spectrum of 2 in Chloroform- <i>d</i> .....9                          |  |
| Figure S12. The HSQC NMR spectrum of 2 in Chloroform- <i>d</i> .....9                                     |  |
| Figure S13. The HMBC NMR spectrum of 2 in Chloroform- <i>d</i> .....10                                    |  |
| Figure S14. The COSY NMR spectrum of 2 in Chloroform- <i>d</i> .....10                                    |  |
| Figure S15. The NOESY spectrum of 2 in Chloroform- <i>d</i> <sub>6</sub> .....11                          |  |
| Figure S16. The UV spectrum of 2 in MeOH.....11                                                           |  |
| Figure S17. The IR spectrum of 2. ....12                                                                  |  |
| Figure S18. The HRESIMS spectrum of 2 .....12                                                             |  |
| Figure S19. The $^1\text{H}$ NMR spectrum of 3 in DMSO- <i>d</i> <sub>6</sub> .....13                     |  |
| Figure S20. The $^{13}\text{C}$ NMR spectrum of 3 in DMSO- <i>d</i> <sub>6</sub> .....13                  |  |
| Figure S21. The HSQC NMR spectrum of 3 in DMSO- <i>d</i> <sub>6</sub> .....14                             |  |
| Figure S22. The HMBC NMR spectrum of 3 in DMSO- <i>d</i> <sub>6</sub> .....14                             |  |
| Figure S23. The COSY NMR spectrum of 3 in DMSO- <i>d</i> <sub>6</sub> .....15                             |  |
| Figure S24. The NOESY spectrum of 3 in DMSO- <i>d</i> <sub>6</sub> .....15                                |  |
| Figure S25. The UV spectrum of 3 in MeOH.....16                                                           |  |
| Figure S26. The HRESIMS spectrum of 3 .....16                                                             |  |
| Figure S27. The $^1\text{H}$ NMR spectrum of 4 in DMSO- <i>d</i> <sub>6</sub> .....17                     |  |
| Figure S28. The $^{13}\text{C}$ NMR spectrum of 4 in DMSO- <i>d</i> <sub>6</sub> .....17                  |  |
| Figure S29. The HSQC NMR spectrum of 4 in DMSO- <i>d</i> <sub>6</sub> .....18                             |  |
| Figure S30. The HMBC NMR spectrum of 4 in DMSO- <i>d</i> <sub>6</sub> .....18                             |  |

|                                                                                                |    |
|------------------------------------------------------------------------------------------------|----|
| Figure S31. The COSY NMR spectrum of 4 in DMSO- <i>d</i> <sub>6</sub> . .....                  | 19 |
| Figure S32. The NOESY spectrum of 4 in DMSO- <i>d</i> <sub>6</sub> . .....                     | 19 |
| Figure S33. The UV spectrum of 4 in MeOH. ....                                                 | 20 |
| Figure S34. The HRESIMS spectrum of 4. ....                                                    | 20 |
| Figure S35. The <sup>1</sup> H NMR spectrum of 5 in DMSO- <i>d</i> <sub>6</sub> . ....         | 21 |
| Figure S36. The <sup>13</sup> C NMR spectrum of 5 in DMSO- <i>d</i> <sub>6</sub> . ....        | 21 |
| Table S1. Energies of all calculated conformers at B97-3c level in methanol. ....              | 22 |
| Table S2. Energies of all calculated conformers at B3LYP/6-31+G (d,p) level in PCM model. .... | 24 |
| Figure S37 NMR calculation results of 1 and 2. ....                                            | 29 |
| Figure S38 Calculation results of the spin-spin coupling constants of 1. ....                  | 29 |
| Figure S39 Calculation results of the spin-spin coupling constants of 2. ....                  | 30 |

**Figure S1.** The  $^{13}\text{C}$  NMR spectrum of **P1** in Chloroform-*d* and its chiral HPLC profile.

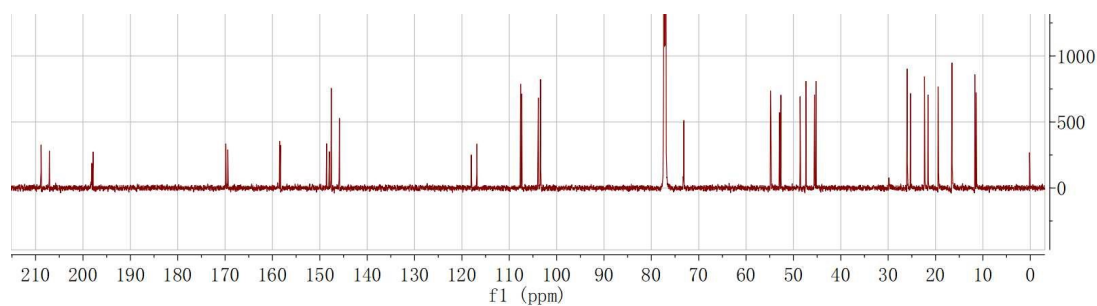

(Daicel Chiralpak IC,  $4.6 \times 250$  mm,  $5\mu\text{m}$ ) using ethanol/n-hexane (v/v: 55:65)

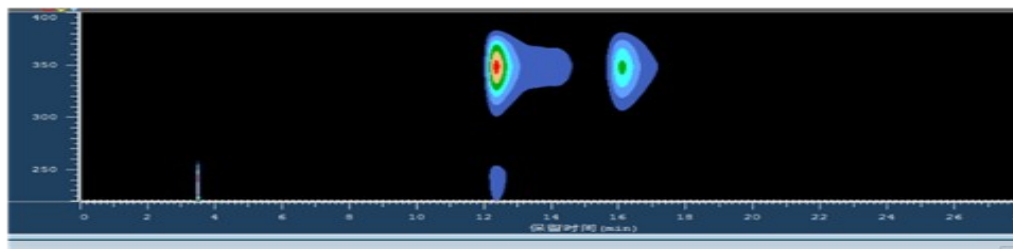

**Figure S2.** The  $^1\text{H}$  NMR spectrum of **1** in Chloroform-*d*.

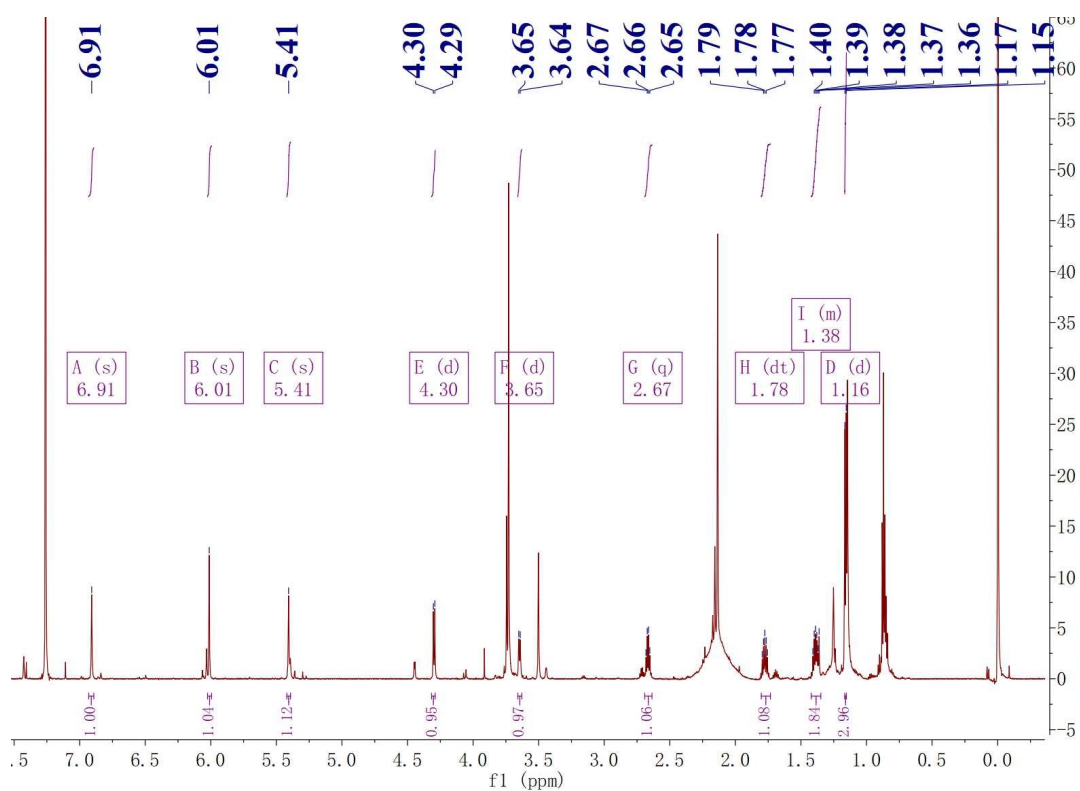

**Figure S3.** The  $^{13}\text{C}$  NMR spectrum of **1** in Chloroform-*d*.

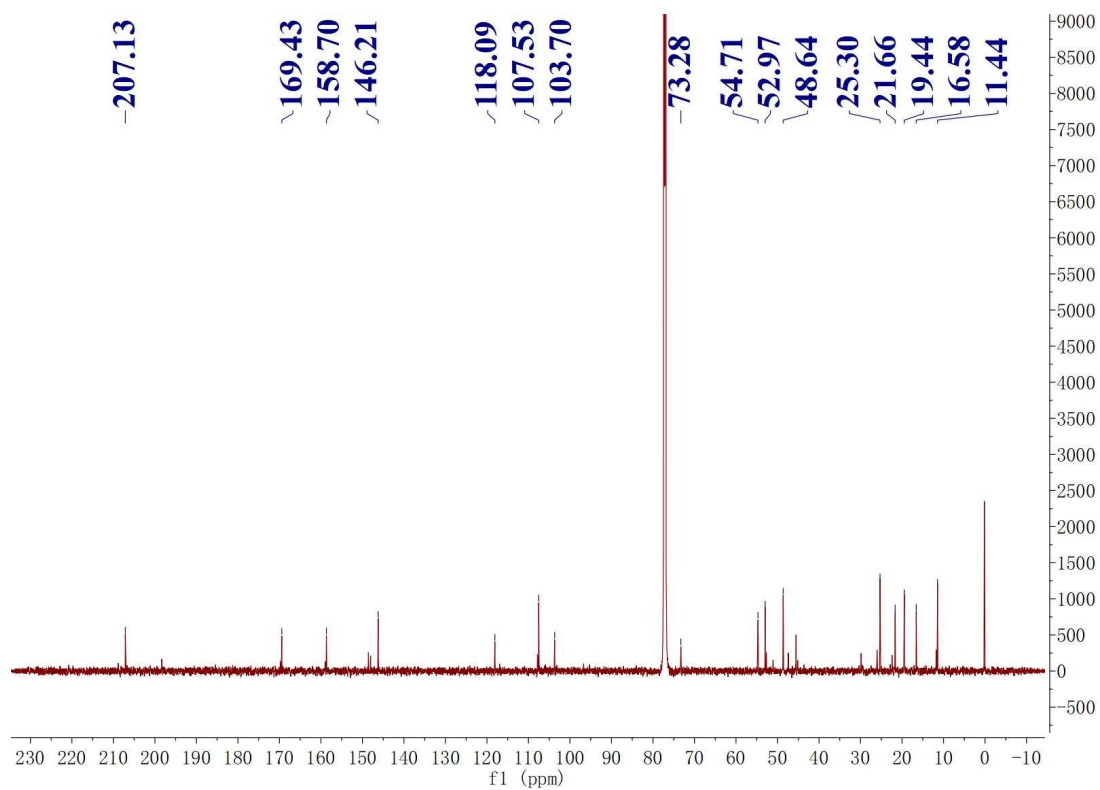

**Figure S4.** The HSQC spectrum of **1** in Chloroform-*d*.

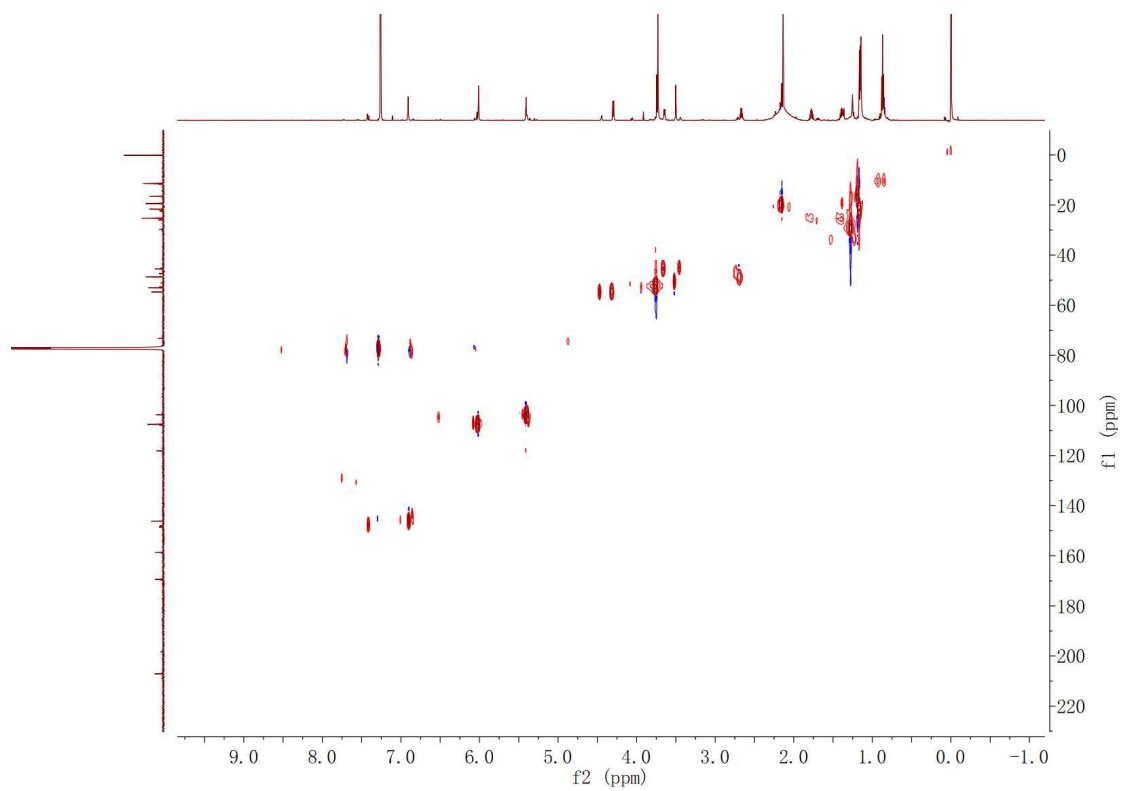

**Figure S5.** The HMBC spectrum of **1** in Chloroform-*d*.

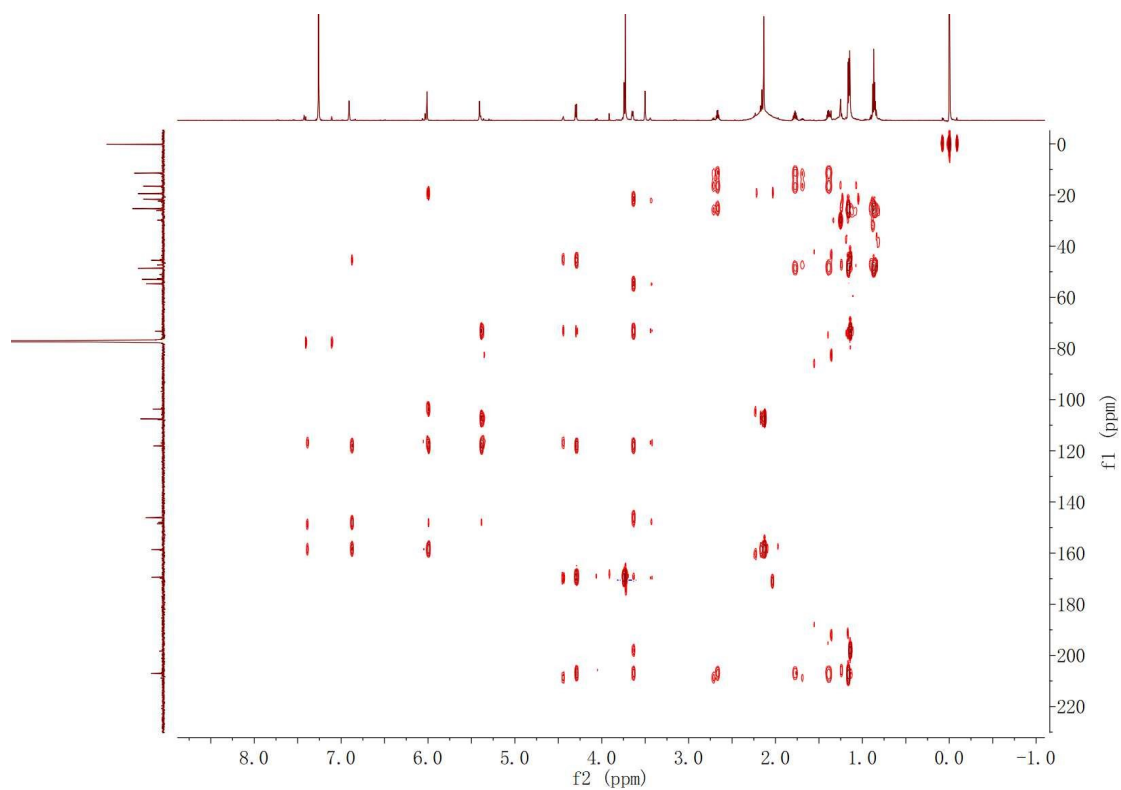

**Figure S6.** The COSY spectrum of **1** in Chloroform-*d*.

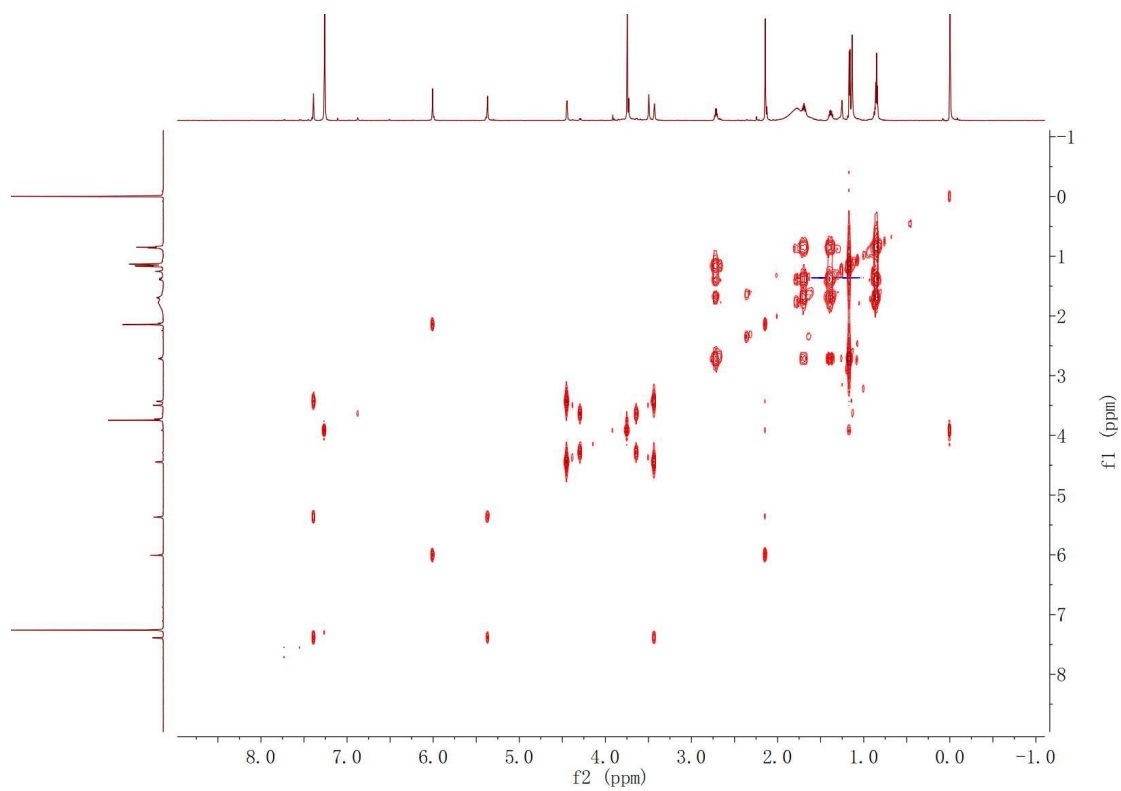

**Figure S7.** The UV spectrum of **1** in MeOH

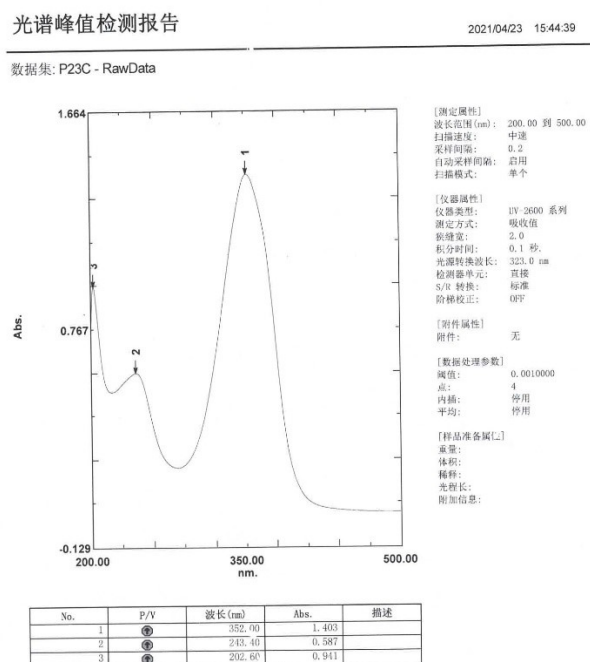

**Figure S8.** The IR spectrum of **1**

# IR Spectrum report

SHIMADZU

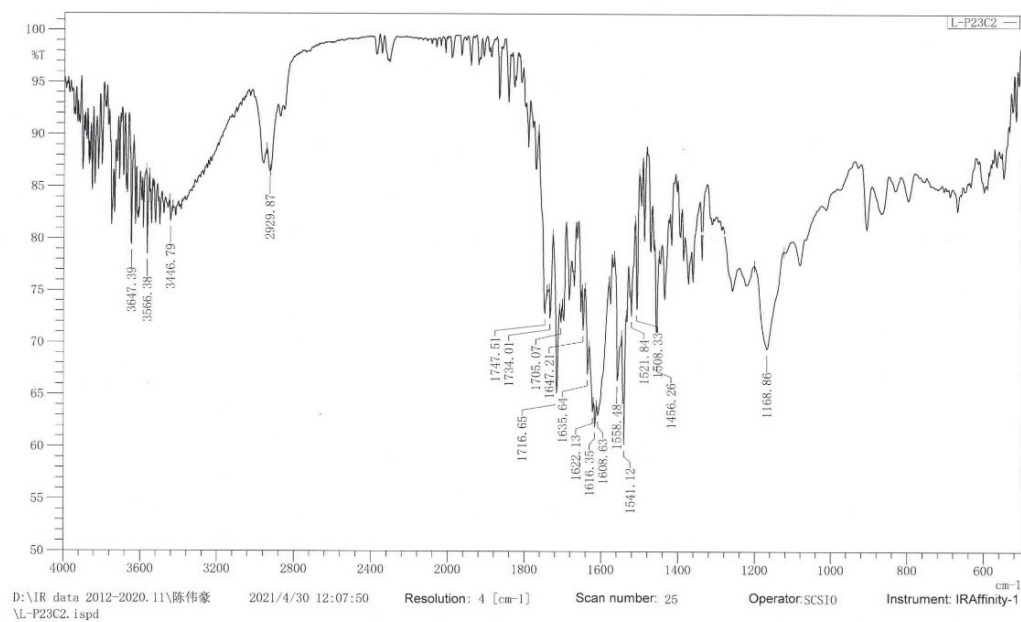

Figure S9. The HRESIMS spectrum of 1



### Mass Spectrum SmartFormula Report

|                      |                                                          |                  |       |                     |  |
|----------------------|----------------------------------------------------------|------------------|-------|---------------------|--|
| <b>Analysis Info</b> |                                                          | Acquisition Date |       | 4/8/2021 2:46:15 PM |  |
| Analysis Name        | D:\Data\MS\data\202104\chenweihao_P23A_pos_72_01_10410.d | Operator         | SCSIO |                     |  |
| Method               | LC_Direct Infusion_pos_70-500mz.m                        | Instrument       | maXis |                     |  |
| Sample Name          | chenweihao_P23A_pos                                      | 255552.00029     |       |                     |  |
| Comment              |                                                          |                  |       |                     |  |

|                              |          |                      |          |                  |           |
|------------------------------|----------|----------------------|----------|------------------|-----------|
| <b>Acquisition Parameter</b> |          |                      |          |                  |           |
| Source Type                  | ESI      | Ion Polarity         | Positive | Set Nebulizer    | 0.4 Bar   |
| Focus                        | Active   | Set Capillary        | 4500 V   | Set Dry Heater   | 180 °C    |
| Scan Begin                   | 70 m/z   | Set End Plate Offset | -500 V   | Set Dry Gas      | 4.0 l/min |
| Scan End                     | 1500 m/z | Set Charging Voltage | 0 V      | Set Divert Valve | Waste     |
|                              |          | Set Corona           | 0 nA     | Set APCI Heater  | 0 °C      |

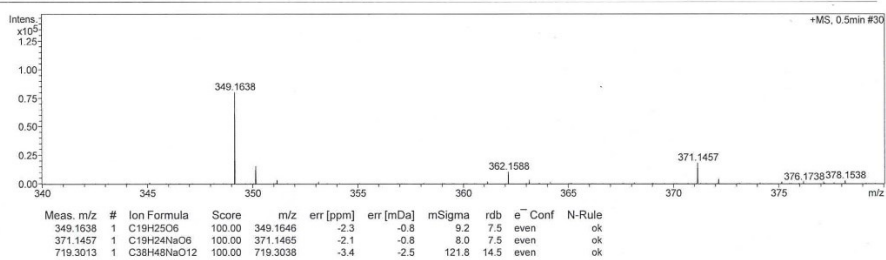

chenweihao\_P23A\_pos\_72\_01\_10410.d  
 Bruker Compass DataAnalysis 4.1 printed: 4/8/2021 2:51:07 PM by: SCSIO Page 1 of 1

**Figure S10.** The <sup>1</sup>H NMR spectrum of **2** in Chloroform-*d*.

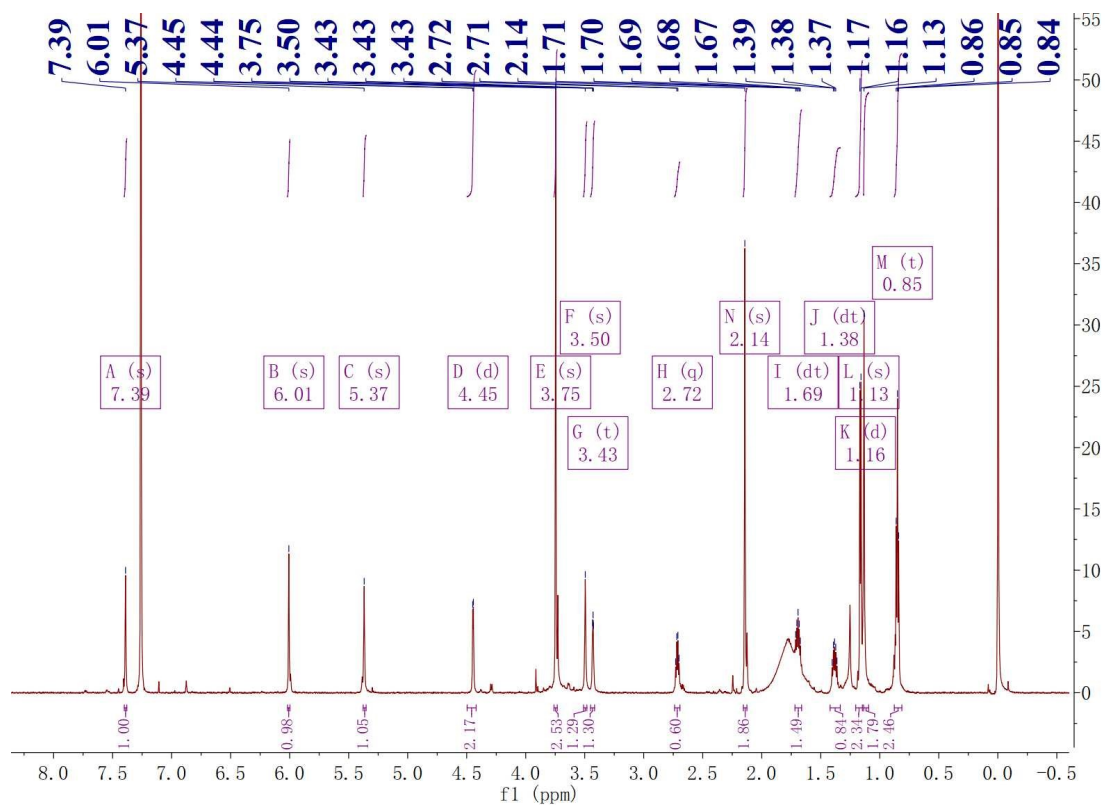

Figure S11. The  $^{13}\text{C}$  NMR spectrum of **2** in Chloroform-*d*.

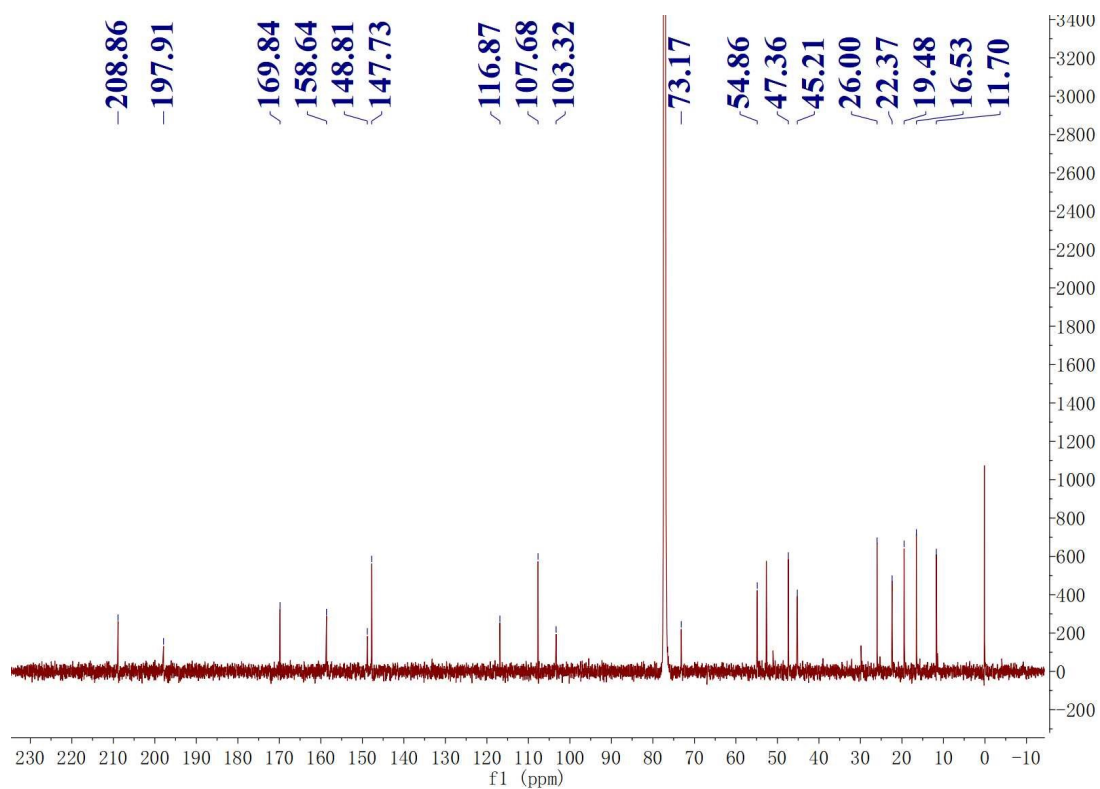

Figure S12. The HSQC NMR spectrum of **2** in Chloroform-*d*.

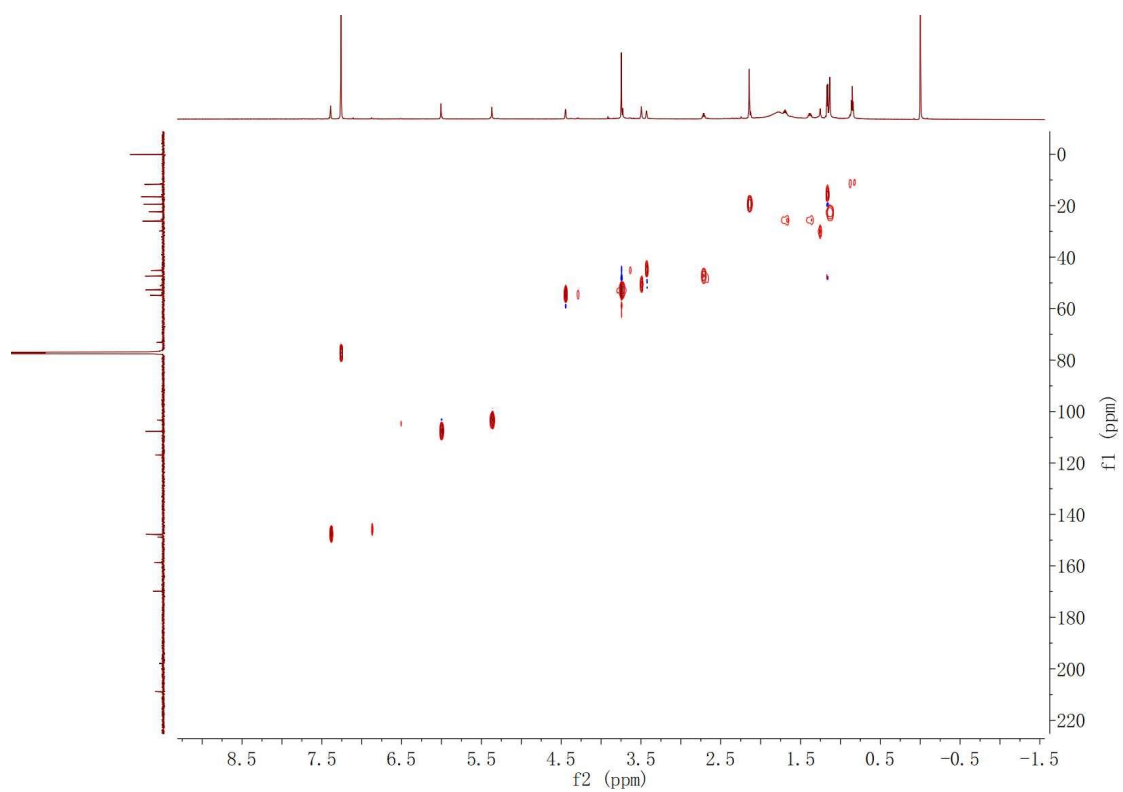

**Figure S13.** The HMBC NMR spectrum of **2** in Chloroform-*d*.

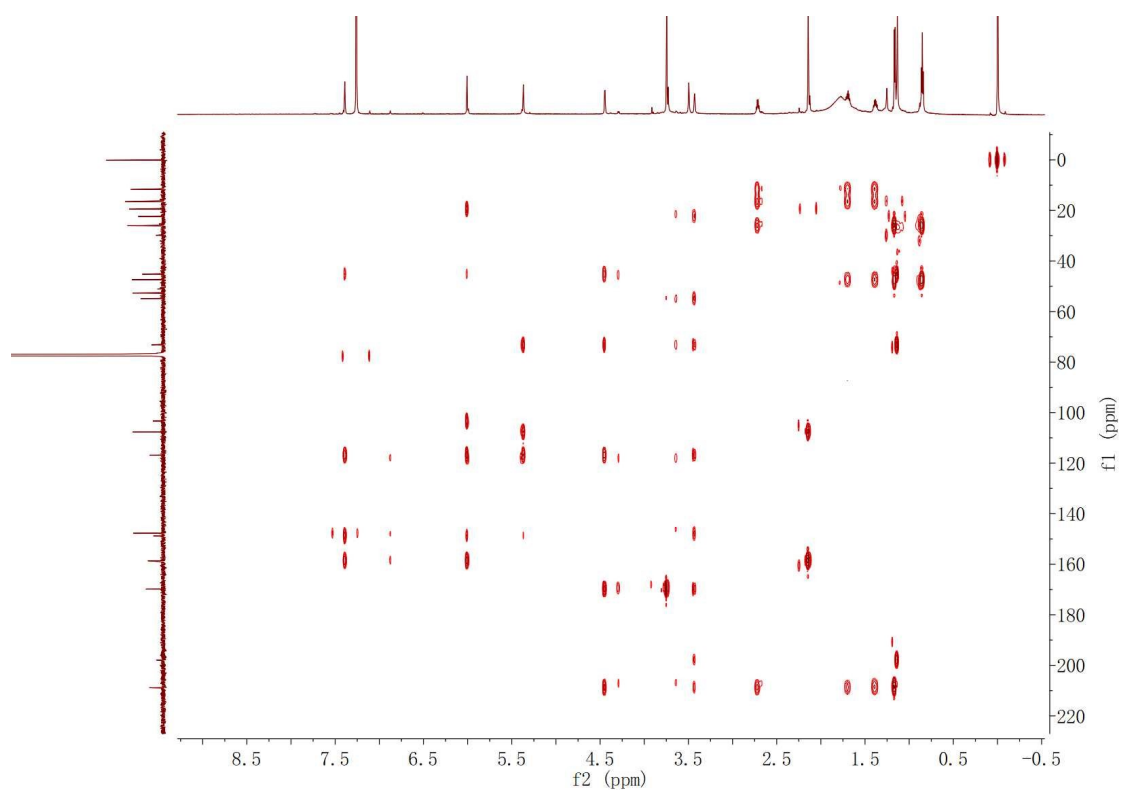

**Figure S14.** The COSY NMR spectrum of **2** in Chloroform-*d*.

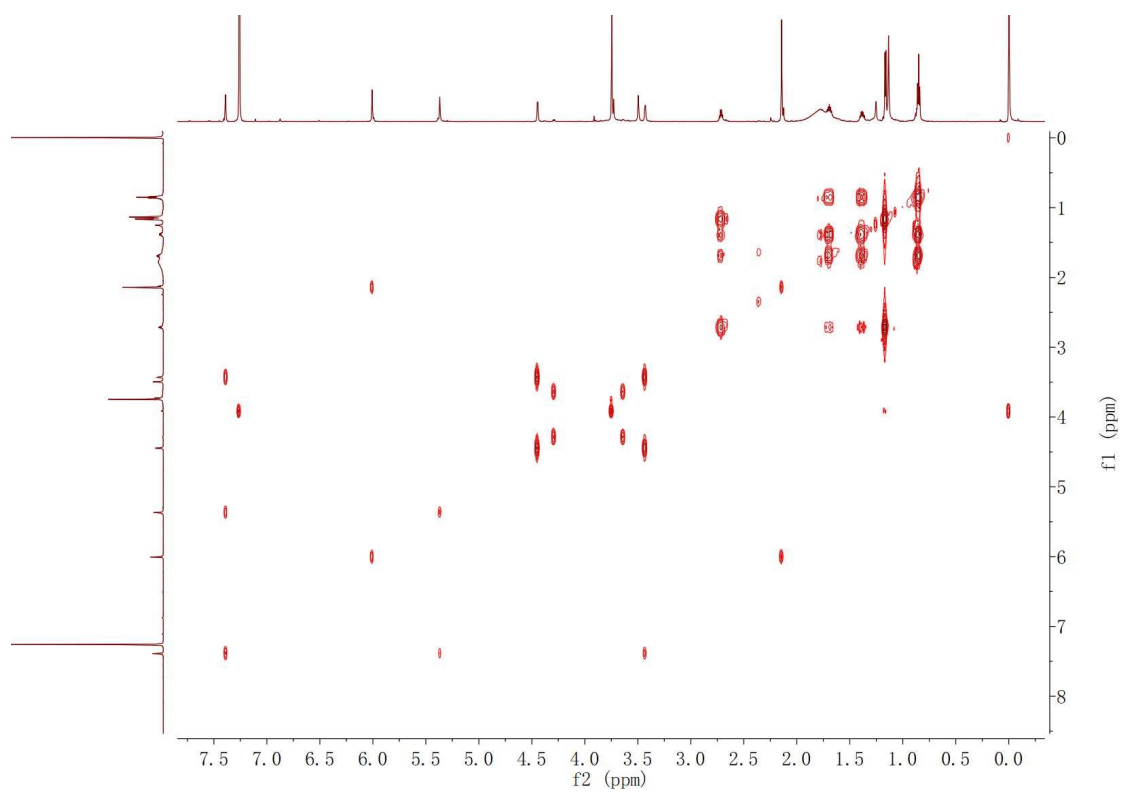

**Figure S15.** The NOESY spectrum of **2** in Chloroform- $d_6$ .

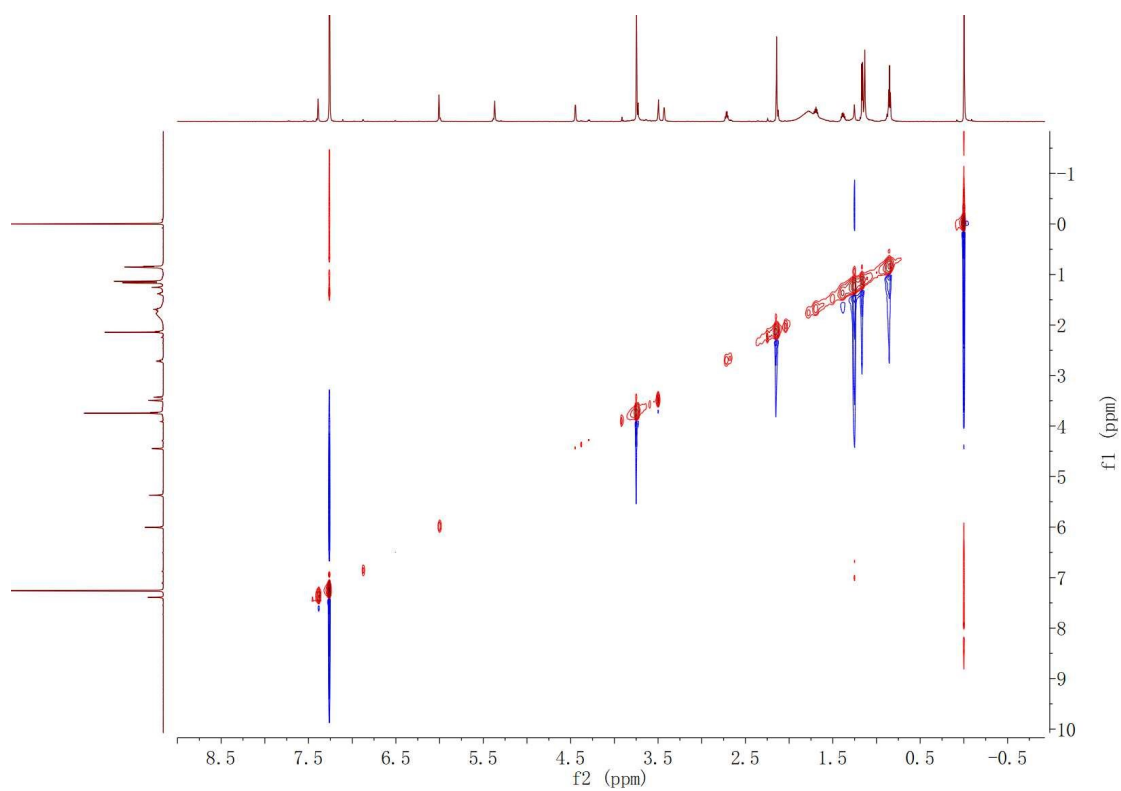

**Figure S16.** The UV spectrum of **2** in MeOH.

数据集: P23A - RawData

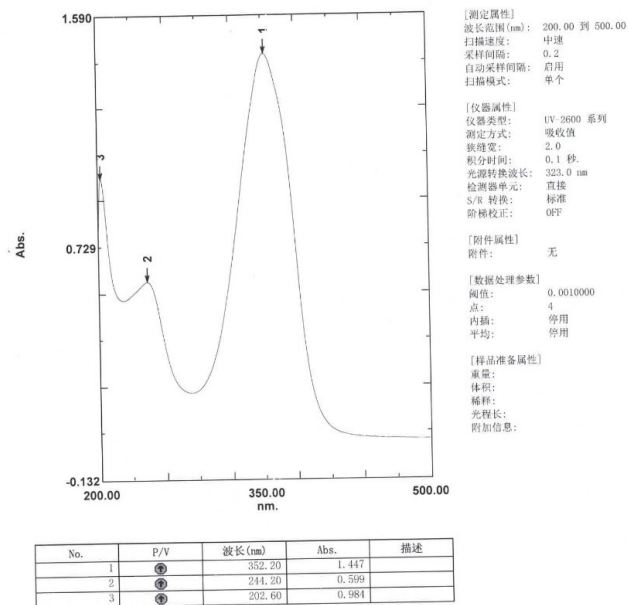

Figure S17. The IR spectrum of 2.

# IR Spectrum report

SHIMADZU

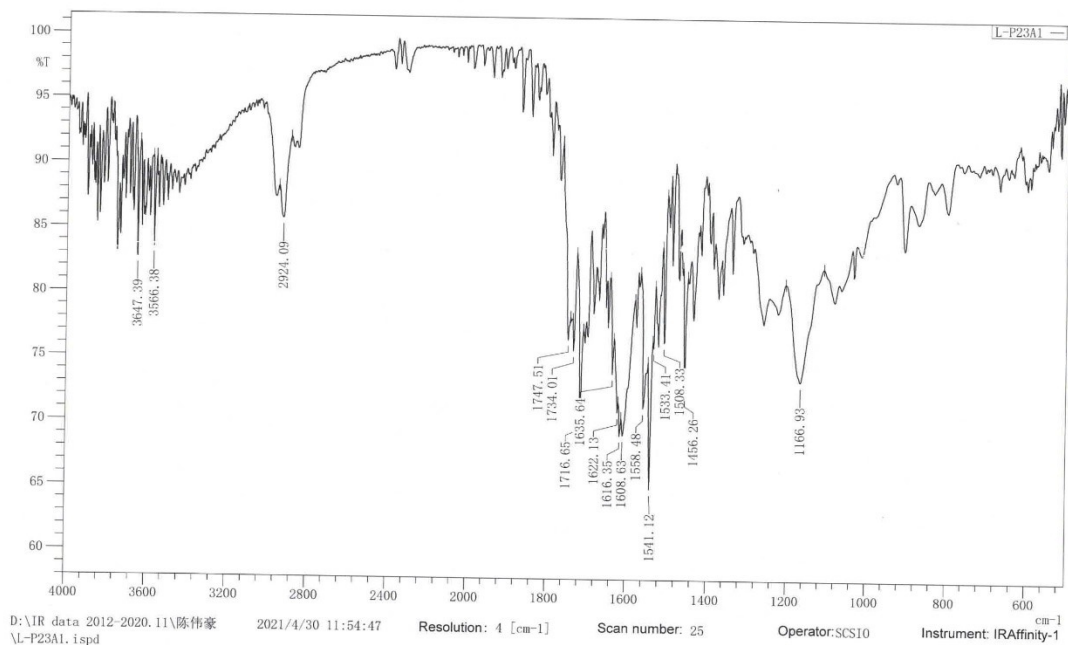

Figure S18. The HRESIMS spectrum of 2

### Mass Spectrum SmartFormula Report

| Analysis Info |                                                          | Acquisition Date    |              |
|---------------|----------------------------------------------------------|---------------------|--------------|
| Analysis Name | D:\Data\MS\data\202104\chenweihao_P23A_pos_72_01_10410.d | 4/8/2021 2:46:15 PM |              |
| Method        | LC_Direct Infusion_pos_70-500mz.m                        | Operator            | SCSIO        |
| Sample Name   | chenweihao_P23A_pos                                      | Instrument          | maxis        |
| Comment       |                                                          |                     | 255552.00029 |

  

| Acquisition Parameter |          |                      |          |                  |           |
|-----------------------|----------|----------------------|----------|------------------|-----------|
| Source Type           | ESI      | Ion Polarity         | Positive | Set Nebulizer    | 0.4 Bar   |
| Focus                 | Active   | Set Capillary        | 4500 V   | Set Dry Heater   | 180 °C    |
| Scan Begin            | 70 m/z   | Set End Plate Offset | -500 V   | Set Dry Gas      | 4.0 l/min |
| Scan End              | 1500 m/z | Set Charging Voltage | 0 V      | Set Divert Valve | Waste     |
|                       |          | Set Corona           | 0 nA     | Set APCI Heater  | 0 °C      |

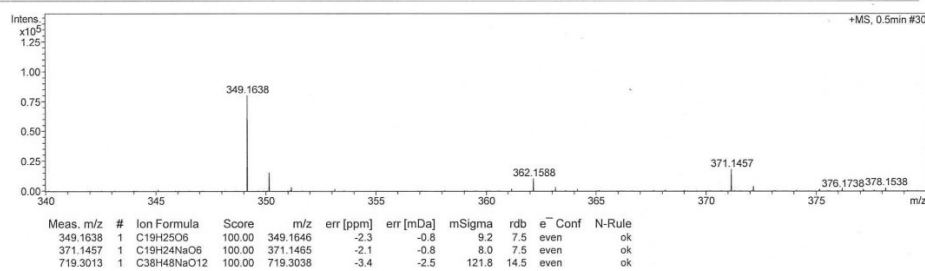

chenweihao\_P23A\_pos\_72\_01\_10410.d  
Bruker Compass DataAnalysis 4.1

printed: 4/8/2021 2:51:07 PM

by: SCSIO

Page 1 of 1

**Figure S19.** The <sup>1</sup>H NMR spectrum of **3** in DMSO-*d*<sub>6</sub>.

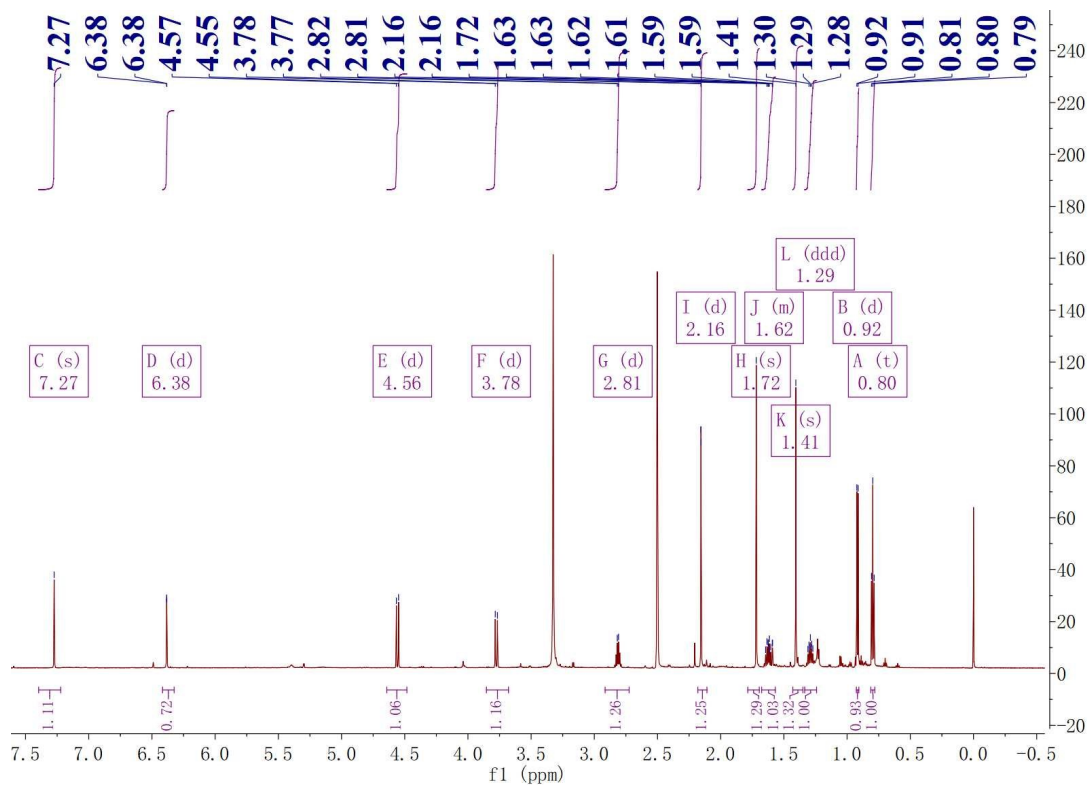

**Figure S20.** The  $^{13}\text{C}$  NMR spectrum of **3** in  $\text{DMSO-}d_6$ .

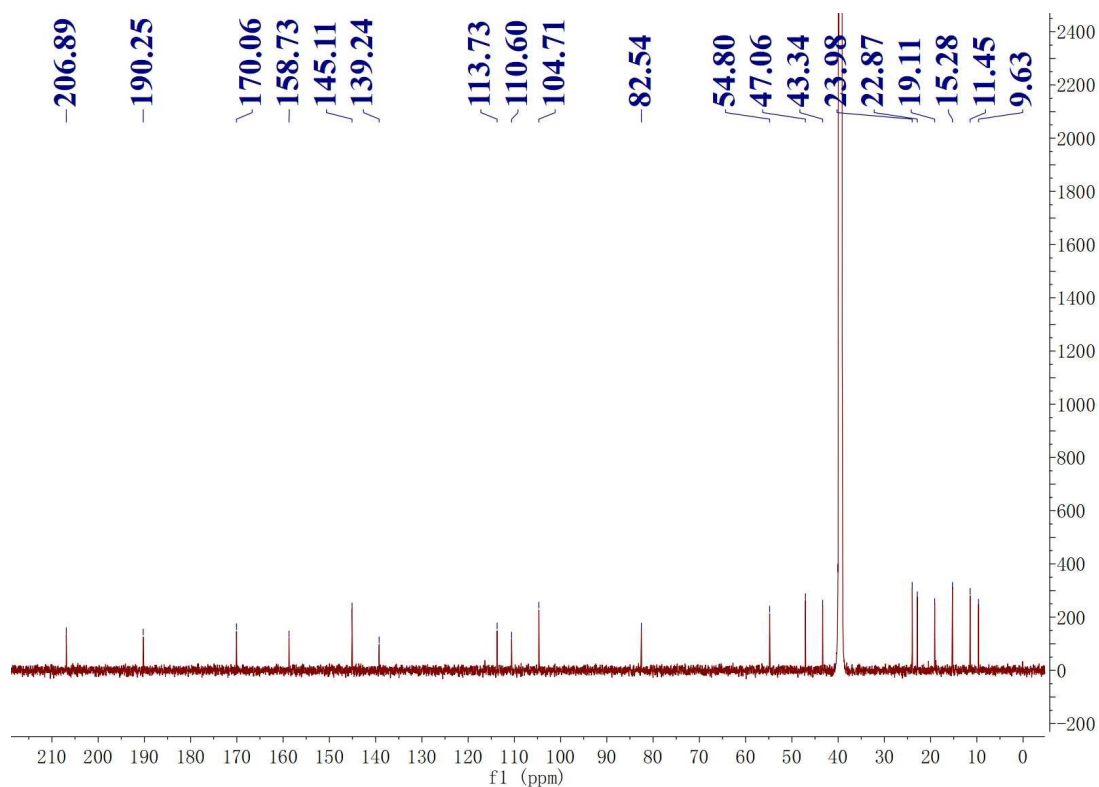

**Figure S21.** The HSQC NMR spectrum of **3** in  $\text{DMSO-}d_6$ .



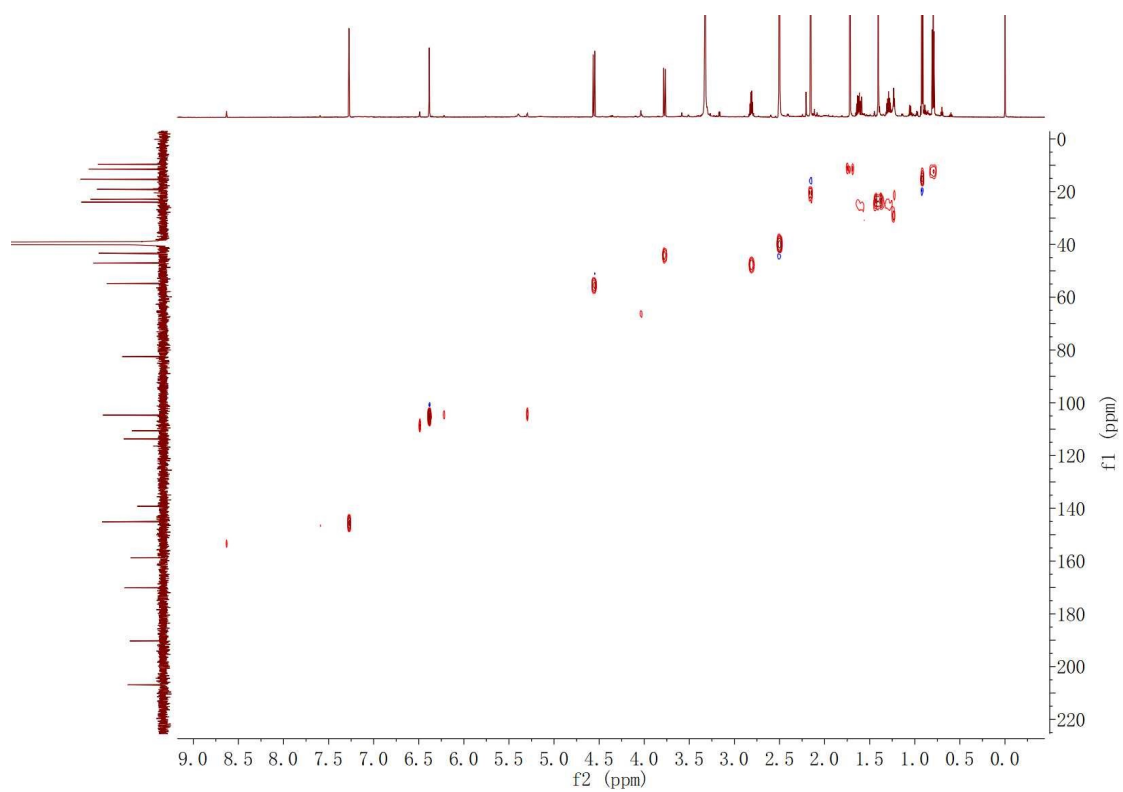

**Figure S22.** The HMBC NMR spectrum of **3** in DMSO- $d_6$ .

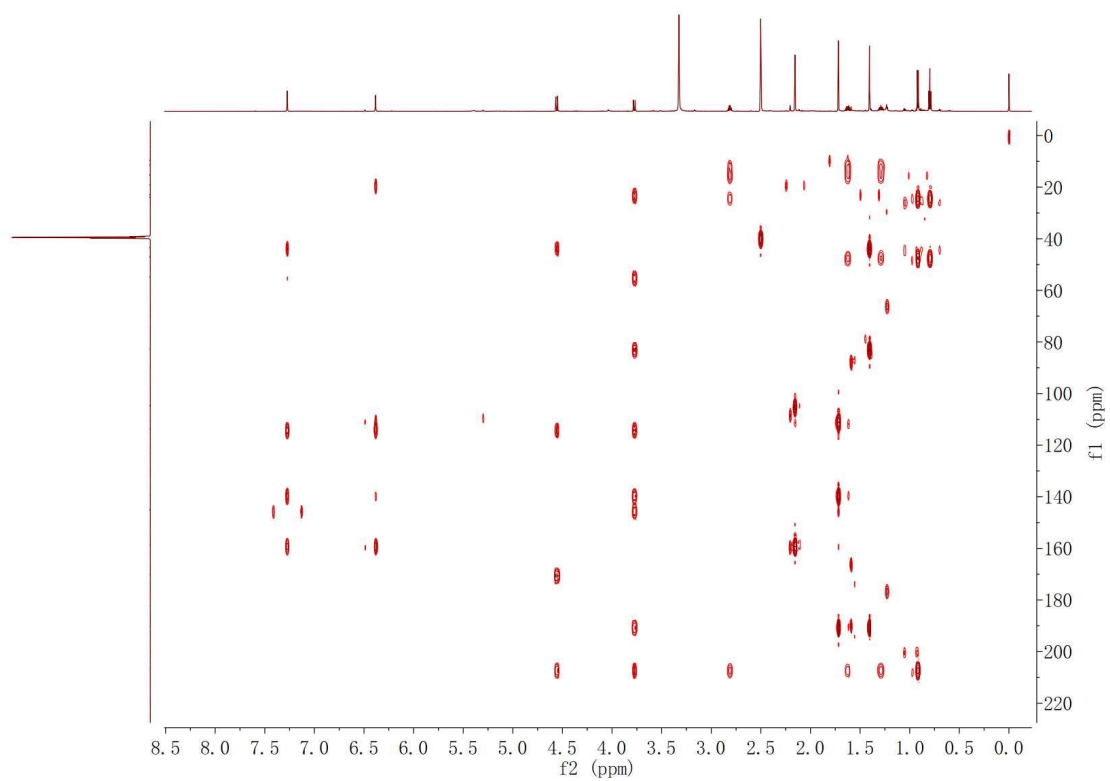

**Figure S23.** The COSY NMR spectrum of **3** in DMSO- $d_6$ .

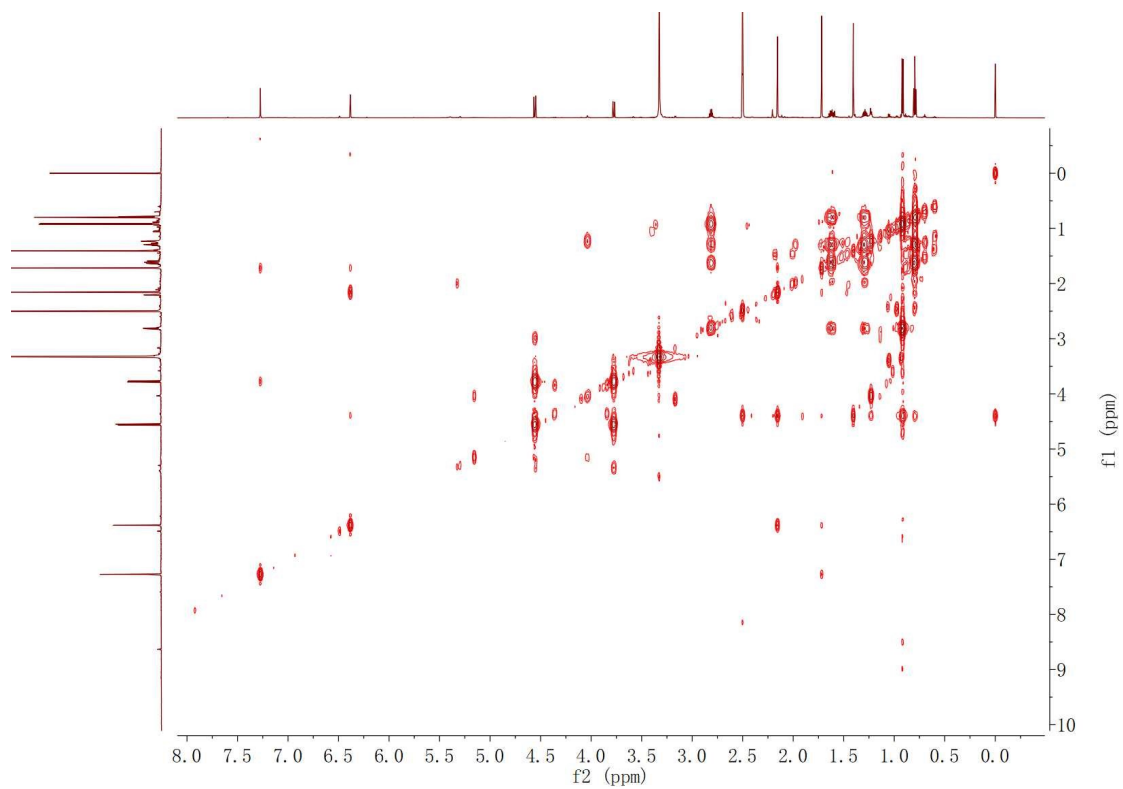

**Figure S24.** The NOESY spectrum of **3** in DMSO- $d_6$ .

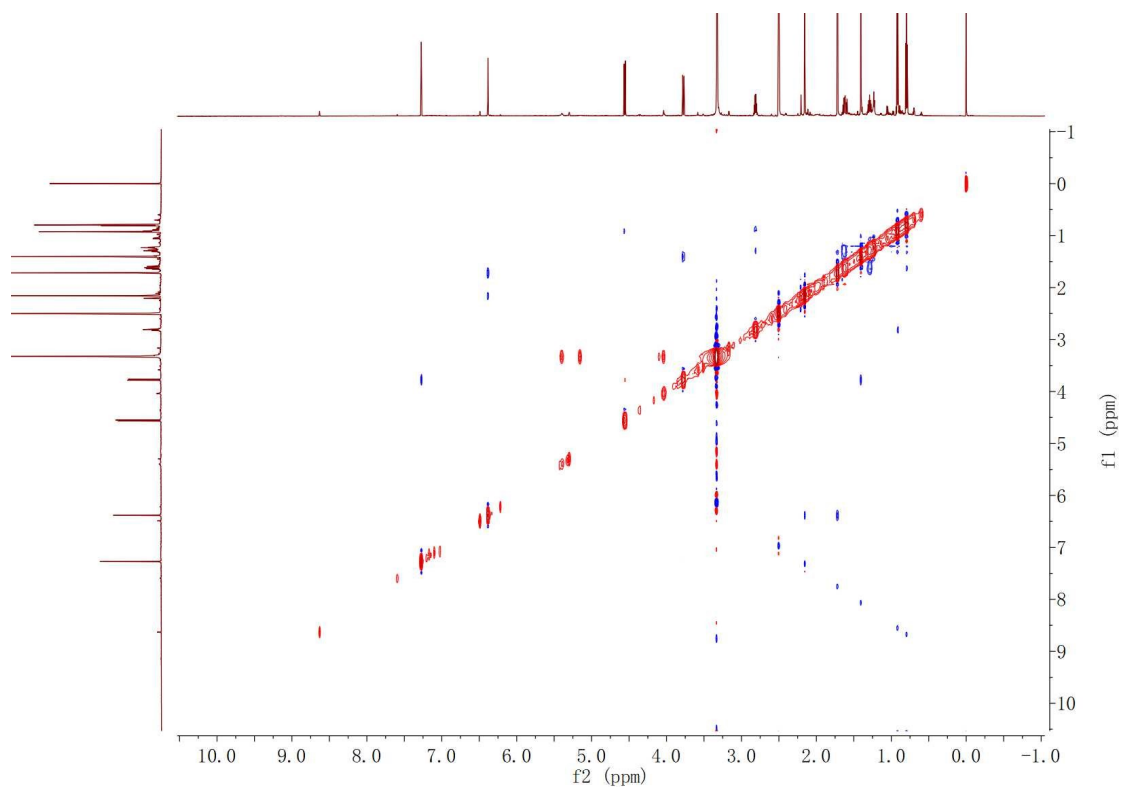

**Figure S25.** The UV spectrum of **3** in MeOH.

数据集: L-P6 - RawData

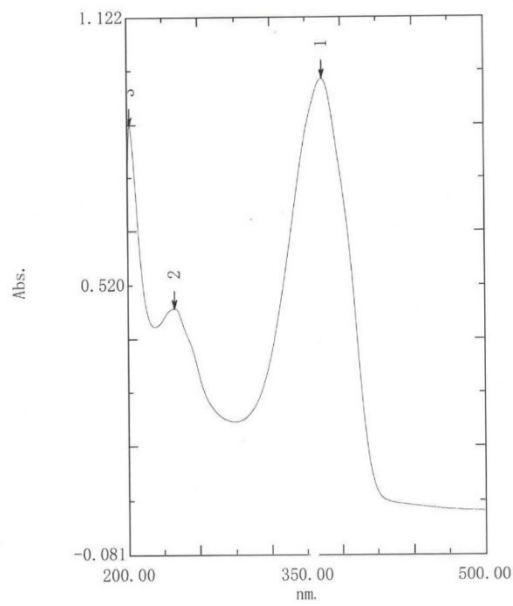

[测定属性]  
 波长范围(nm): 200.00 到 500.00  
 扫描速度: 中速  
 采样间隔: 0.2  
 自动采样间隔: 启用  
 扫描模式: 单个

[仪器属性]  
 仪器类型: UV-2600 系列  
 测定方式: 吸收值  
 狭缝宽: 2.0  
 积分时间: 0.1 秒  
 光源转换波长: 323.0 nm  
 检测器单元: 直接  
 S/R 转换: 标准  
 阶梯校正: OFF

[附件属性]  
 附件: 无

[数据处理参数]  
 阈值: 0.0010000  
 点: 4  
 内插: 停用  
 平均: 停用

[样品准备属性]  
 重量:  
 体积:  
 稀释:  
 光程长:  
 附加信息:

| No. | P/V | 波长 (nm) | Abs.  | 描述 |
|-----|-----|---------|-------|----|
| 1   | ①   | 363.80  | 0.984 |    |
| 2   | ②   | 239.20  | 0.468 |    |
| 3   | ③   | 201.80  | 0.877 |    |

Figure S26. The HRESIMS spectrum of **3**

### Mass Spectrum SmartFormula Report

|                      |                                                         |                  |       |                     |  |
|----------------------|---------------------------------------------------------|------------------|-------|---------------------|--|
| <b>Analysis Info</b> |                                                         | Acquisition Date |       | 2/5/2021 5:06:17 PM |  |
| Analysis Name        | D:\Data\MS\data\202102\chenweihao_L-P6_pos_71_01_9970.d | Operator         | SCSIO |                     |  |
| Method               | LC_Direct Infusion_pos_70-500mz.m                       | Instrument       | maXis | 255552.00029        |  |
| Sample Name          | chenweihao_L-P6_pos                                     | Comment          |       |                     |  |

|                              |          |                      |          |                  |           |
|------------------------------|----------|----------------------|----------|------------------|-----------|
| <b>Acquisition Parameter</b> |          |                      |          |                  |           |
| Source Type                  | ESI      | Ion Polarity         | Positive | Set Nebulizer    | 0.4 Bar   |
| Focus                        | Active   | Set Capillary        | 4500 V   | Set Dry Heater   | 180 °C    |
| Scan Begin                   | 70 m/z   | Set End Plate Offset | -500 V   | Set Dry Gas      | 4.0 l/min |
| Scan End                     | 1500 m/z | Set Charging Voltage | 0 V      | Set Divert Valve | Waste     |
|                              |          | Set Corona           | 0 nA     | Set APCI Heater  | 0 °C      |

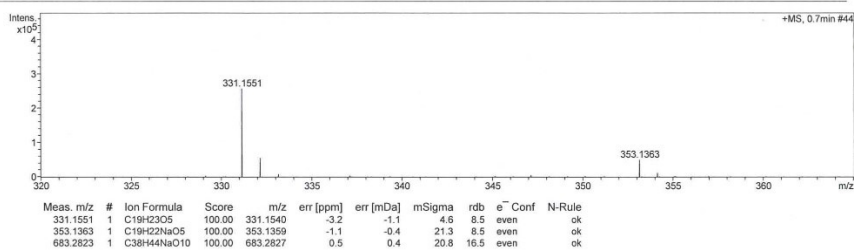

**Figure S27.** The <sup>1</sup>H NMR spectrum of **4** in DMSO-*d*<sub>6</sub>.

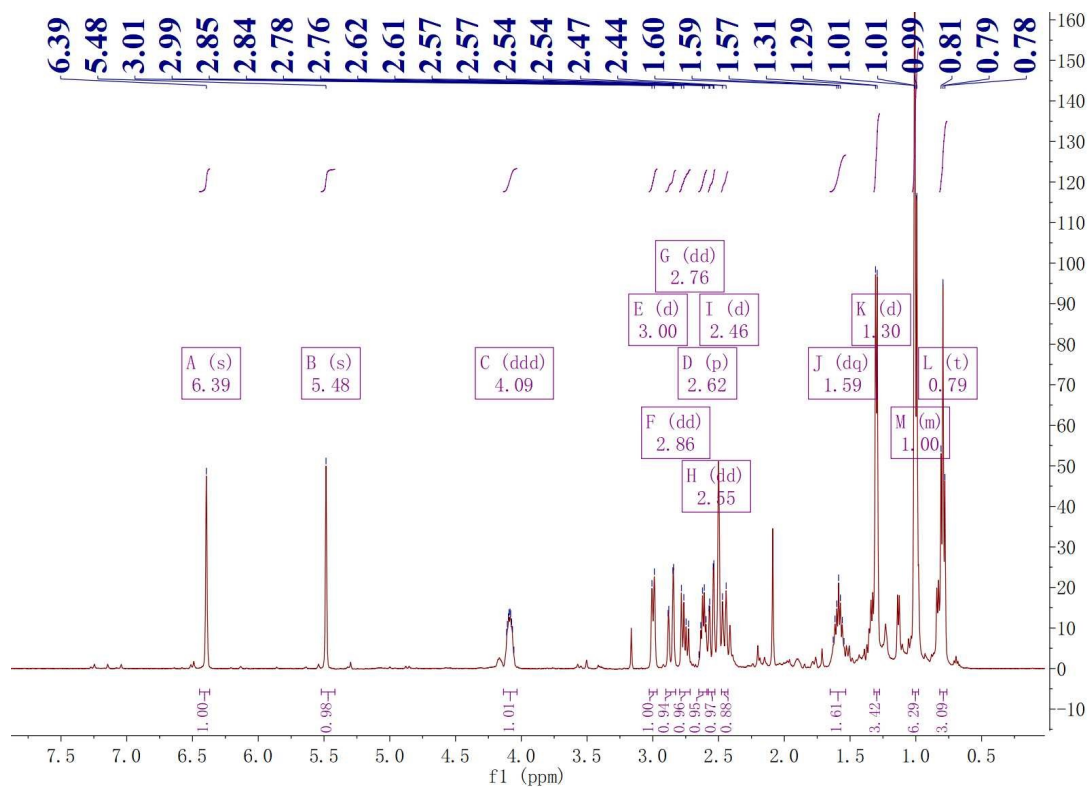

**Figure S28.** The  $^{13}\text{C}$  NMR spectrum of **4** in  $\text{DMSO-}d_6$ .

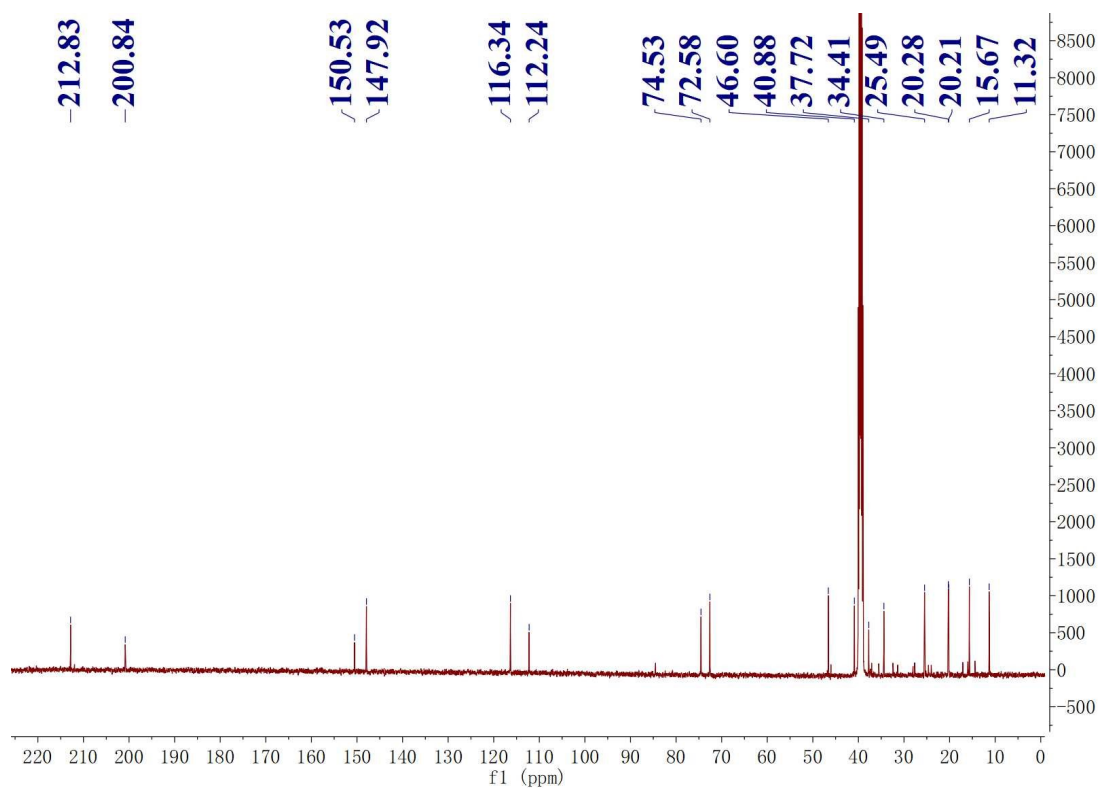

**Figure S29.** The HSQC NMR spectrum of **4** in DMSO- $d_6$ .

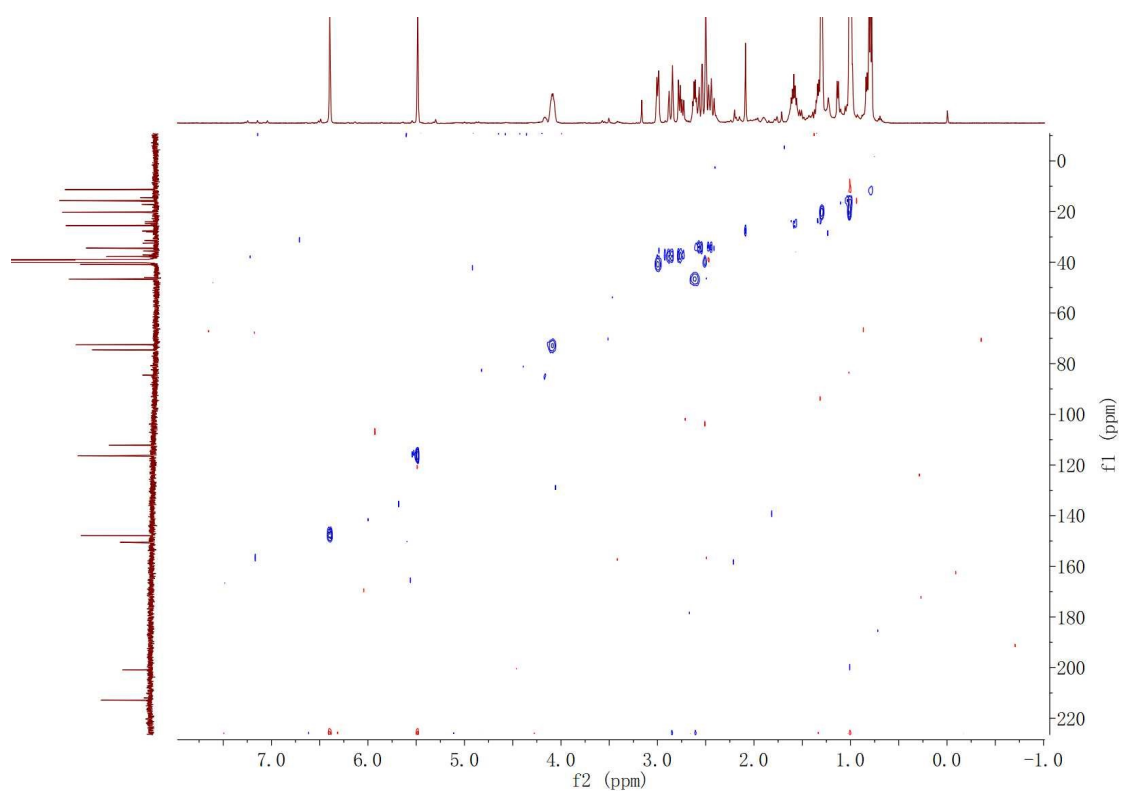

**Figure S30.** The HMBC NMR spectrum of **4** in DMSO- $d_6$ .

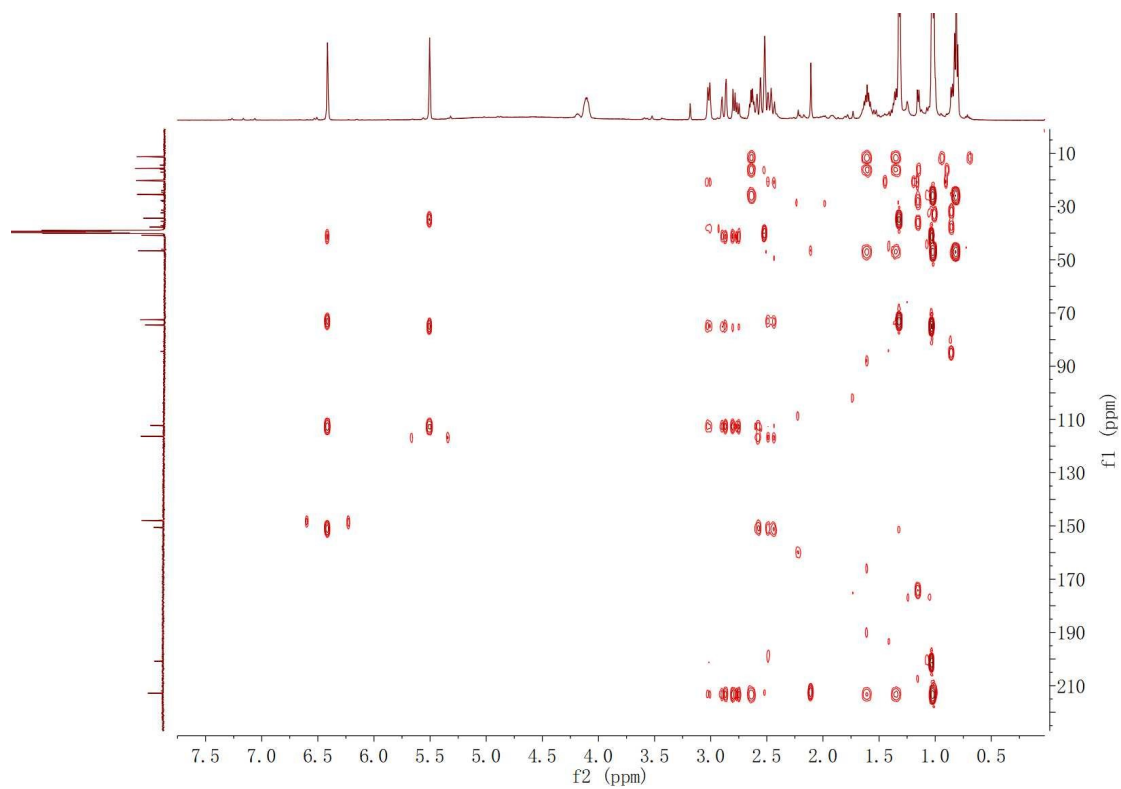

**Figure S31.** The COSY NMR spectrum of **4** in DMSO- $d_6$ .

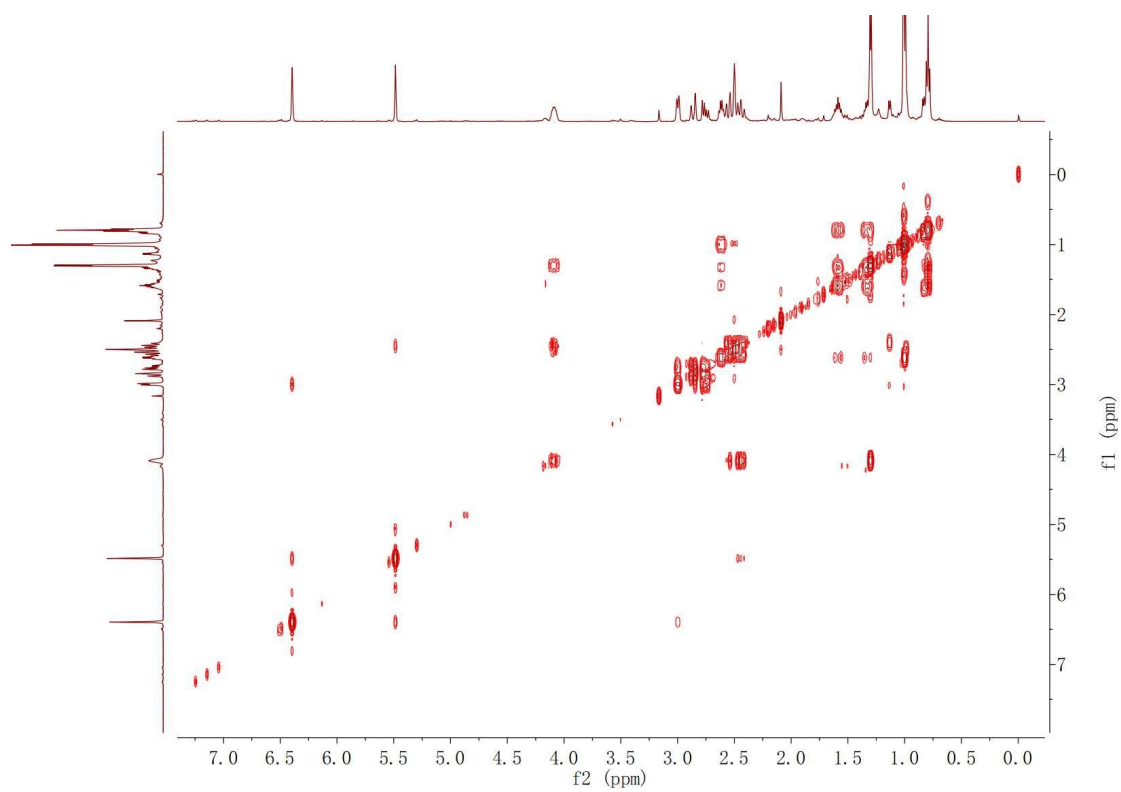

**Figure S32.** The NOESY spectrum of **4** in DMSO-*d*<sub>6</sub>.

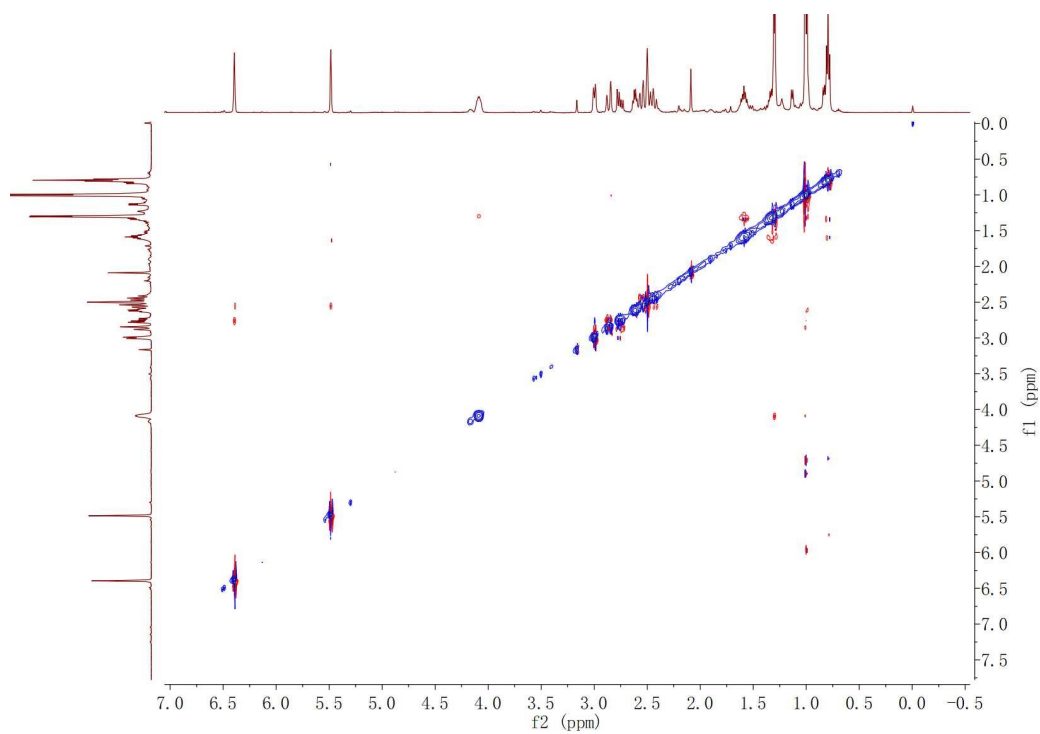

**Figure S33.** The UV spectrum of **4** in MeOH.

数据集: L-P2 - RawData

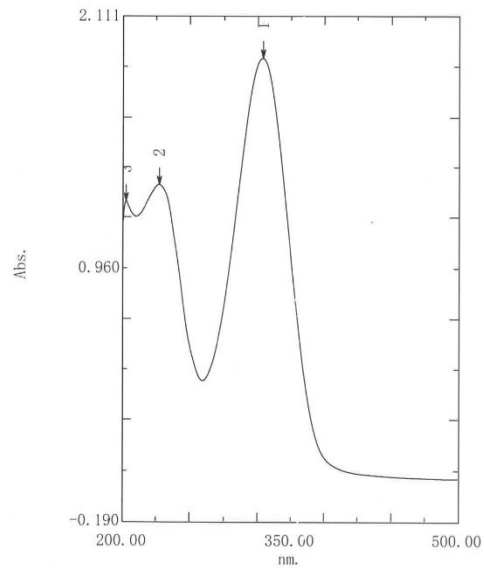

[测定属性]  
 波长范围 (nm): 200.00 到 500.00  
 扫描速度: 中速  
 采样间隔: 0.2  
 自动采样间隔: 启用  
 扫描模式: 单个

[仪器属性]  
 仪器类型: UV-2600 系列  
 测定方式: 吸收值  
 狭缝宽: 2.0  
 积分时间: 0.1 秒  
 光源转换波长: 323.0 nm  
 检测器单元: 直接  
 S/R 转换: 标准  
 阶梯校正: OFF

[附件属性]  
 附件: 无

[数据处理参数]  
 阈值: 0.0010000  
 点: 4  
 内插: 停用  
 平均: 停用

[样品准备属性]  
 重量:  
 体积:  
 稀释:  
 光程长:  
 附加信息:

| No. | P/V | 波长 (nm) | Abs.  | 描述 |
|-----|-----|---------|-------|----|
| 1   | ●   | 324.40  | 1.919 |    |
| 2   | ●   | 232.40  | 1.340 |    |
| 3   | ●   | 202.80  | 1.264 |    |

Figure S34. The HRESIMS spectrum of 4.



### Mass Spectrum SmartFormula Report

|                      |                                                         |                  |       |                       |  |
|----------------------|---------------------------------------------------------|------------------|-------|-----------------------|--|
| <b>Analysis Info</b> |                                                         | Acquisition Date |       | 1/27/2021 11:48:43 AM |  |
| Analysis Name        | D:\Data\MS\data\202101\chenweihao_L-P2_pos_51_01_9866.d | Operator         | SCSIO |                       |  |
| Method               | LC_Direct Infusion_pos_70-500mz.m                       | Instrument       | maXis | 255552.00029          |  |
| Sample Name          | chenweihao_L-P2_pos                                     | Comment          |       |                       |  |

|                              |          |                      |          |                  |           |
|------------------------------|----------|----------------------|----------|------------------|-----------|
| <b>Acquisition Parameter</b> |          |                      |          |                  |           |
| Source Type                  | ESI      | Ion Polarity         | Positive | Set Nebulizer    | 0.4 Bar   |
| Focus                        | Active   | Set Capillary        | 4500 V   | Set Dry Heater   | 180 °C    |
| Scan Begin                   | 70 m/z   | Set End Plate Offset | -500 V   | Set Dry Gas      | 4.0 l/min |
| Scan End                     | 1500 m/z | Set Charging Voltage | 0 V      | Set Divert Valve | Waste     |
|                              |          | Set Corona           | 0 nA     | Set APCI Heater  | 0 °C      |

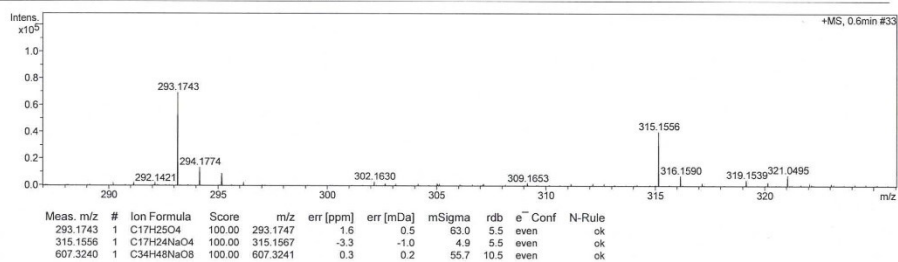

**Figure S35.** The <sup>1</sup>H NMR spectrum of **5** in DMSO-*d*<sub>6</sub>.

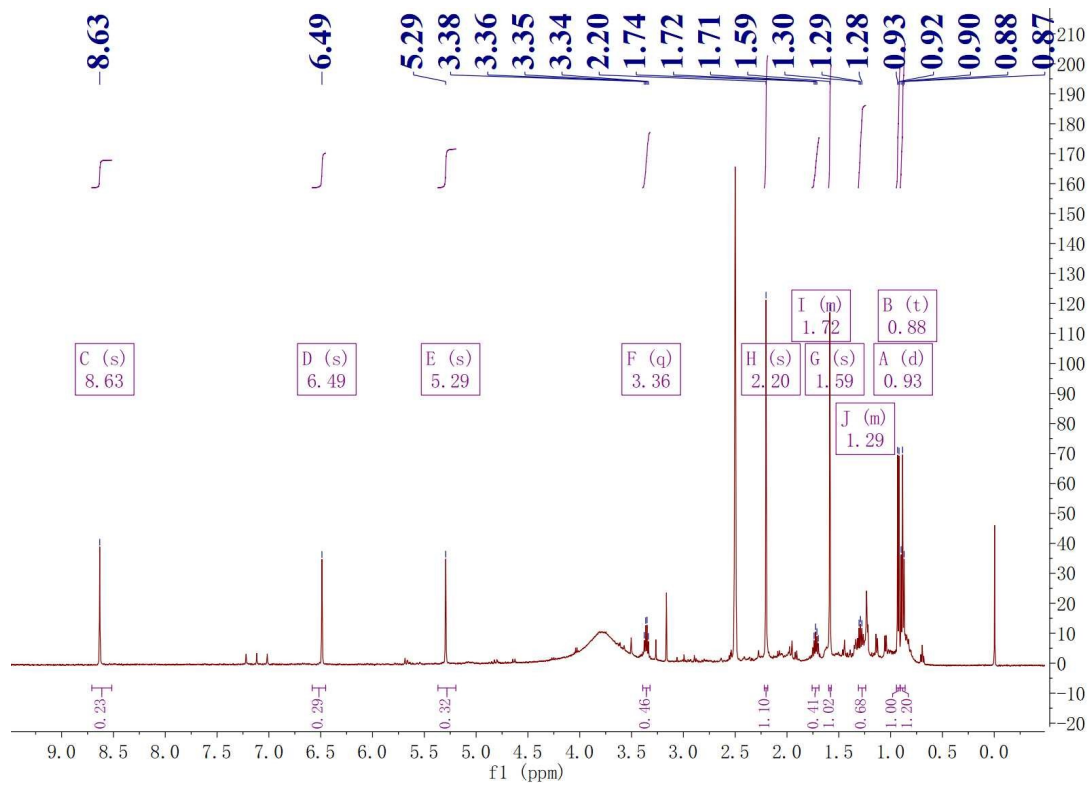

Figure S36. The  $^{13}\text{C}$  NMR spectrum of **5** in  $\text{DMSO-}d_6$ .

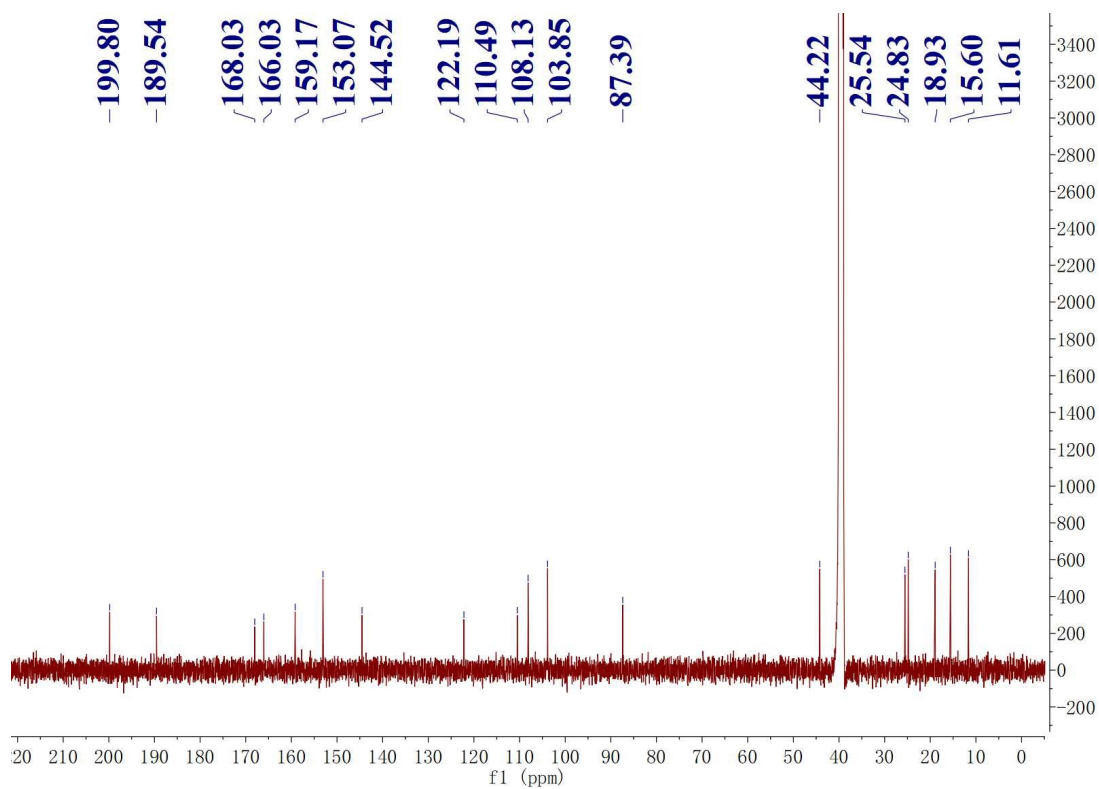

## The optimized conformers and equilibrium populations of calculated compounds

**Table S1. Energies of all calculated conformers at B97-3c level in methanol.**

| Configurations                                              | Conformers                                                                          | E (Hartree)  | $\Delta E$ (kcal/mol) | Population (%) |
|-------------------------------------------------------------|-------------------------------------------------------------------------------------|--------------|-----------------------|----------------|
| 6 <i>S</i> ,7 <i>R</i> - <b>a1</b>                          | 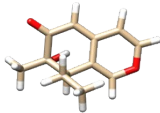   | -690.840080  | 0.00                  | 87.9           |
| 6 <i>S</i> ,7 <i>R</i> - <b>a2</b>                          |    | -690.838208  | 1.17                  | 12.1           |
| 6 <i>R</i> ,7 <i>S</i> - <b>b1</b>                          |    | -690.843390  | 0.00                  | 82.77          |
| 6 <i>R</i> ,7 <i>S</i> - <b>b2</b>                          |   | -690.841908  | 0.93                  | 17.23          |
| 6 <i>S</i> ,7 <i>R</i> ,10 <i>R</i> - <b>c1</b>             |  | -992.543770  | 0.00                  | 100            |
| 6 <i>R</i> ,7 <i>S</i> ,10 <i>S</i> - <b>d1</b>             |  | -1112.892630 | 0.00                  | 64.7           |
| 6 <i>R</i> ,7 <i>S</i> ,10 <i>S</i> - <b>d2</b>             |  | -1112.891726 | 0.57                  | 24.84          |
| 6 <i>R</i> ,7 <i>S</i> ,10 <i>S</i> - <b>d3</b>             |  | -1112.890909 | 1.08                  | 10.46          |
| 2 <i>R</i> ,6 <i>R</i> ,7 <i>S</i> ,12 <i>S</i> - <b>4a</b> |  | -691.906009  | 0.00                  | 100            |
| 2 <i>S</i> ,6 <i>R</i> ,7 <i>S</i> ,12 <i>S</i> - <b>4b</b> |  | -691.906933  | 0.00                  | 100            |

---

|                                                     |                                                                                     |              |      |       |
|-----------------------------------------------------|-------------------------------------------------------------------------------------|--------------|------|-------|
| 2 <i>R</i> ,6 <i>S</i> ,7 <i>R</i> ,12 <i>S</i> -4c | 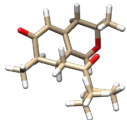   | -691.904997  | 0.00 | 100   |
| 2 <i>S</i> ,6 <i>S</i> ,7 <i>R</i> ,12 <i>S</i> -4d |    | -691.907267  | 0.00 | 100   |
| 6 <i>R</i> ,13 <i>S</i> -5a1                        |    | -1072.390590 | 0.00 | 68.77 |
| 6 <i>R</i> ,13 <i>S</i> -5a2                        |    | -1072.389723 | 0.54 | 27.44 |
| 6 <i>R</i> ,13 <i>S</i> -5a3                        |    | -1072.387855 | 1.72 | 3.79  |
| 6 <i>R</i> ,13 <i>R</i> -5b1                        |  | -1072.389826 | 0.00 | 68.90 |
| 6 <i>R</i> ,13 <i>R</i> -5b2                        |  | -1072.388863 | 0.60 | 24.84 |
| 6 <i>R</i> ,13 <i>R</i> -5b3                        |  | -1072.387561 | 1.42 | 6.26  |
| 6 <i>S</i> ,13 <i>S</i> -5c1                        |  | -1072.388531 | 0.00 | 62.08 |
| 6 <i>S</i> ,13 <i>S</i> -5c2                        |  | -1072.387861 | 0.42 | 30.53 |
| 6 <i>S</i> ,13 <i>S</i> -5c3                        |  | -1072.386521 | 1.26 | 7.39  |

---

|                              |                                                                                   |              |      |       |
|------------------------------|-----------------------------------------------------------------------------------|--------------|------|-------|
| 6 <i>S</i> ,13 <i>R</i> -5d1 | 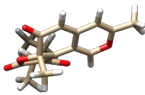 | -1072.391651 | 0.00 | 66.38 |
| 6 <i>S</i> ,13 <i>R</i> -5d2 |  | -1072.390463 | 0.75 | 18.86 |
| 6 <i>S</i> ,13 <i>R</i> -5d3 |  | -1072.390231 | 0.89 | 14.75 |

**Table S2. Energies of all calculated conformers at B3LYP/6-31+G (d,p) level in PCM model.**

| Configurations                                        | Conformers                                                                          | E (Hartree)  | $\Delta E$ (kcal/mol) | Population (%) |
|-------------------------------------------------------|-------------------------------------------------------------------------------------|--------------|-----------------------|----------------|
| 6 <i>R</i> ,7 <i>S</i> ,10 <i>S</i> ,12 <i>S</i> -1a1 | 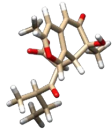 | -1149.660672 | 0.00                  | 94.75          |
| 6 <i>R</i> ,7 <i>S</i> ,10 <i>S</i> ,12 <i>S</i> -1a2 |  | -1149.657941 | 1.71                  | 5.25           |
| 6 <i>R</i> ,7 <i>S</i> ,10 <i>S</i> ,12 <i>R</i> -1b1 |  | -1149.653468 | 0.00                  | 55.18          |
| 6 <i>R</i> ,7 <i>S</i> ,10 <i>S</i> ,12 <i>R</i> -1b2 |  | -1149.652824 | 0.40                  | 27.90          |
| 6 <i>R</i> ,7 <i>S</i> ,10 <i>S</i> ,12 <i>R</i> -1b3 |  | -1149.652352 | 0.7                   | 16.92          |

---

|                                                               |                                                                                     |              |      |       |
|---------------------------------------------------------------|-------------------------------------------------------------------------------------|--------------|------|-------|
| 6 <i>R</i> ,7 <i>S</i> ,10 <i>R</i> ,12 <i>S</i> - <b>2a1</b> | 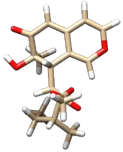   | -1150.152390 | 0.00 | 73.74 |
| 6 <i>R</i> ,7 <i>S</i> ,10 <i>R</i> ,12 <i>S</i> - <b>2a2</b> |    | -1150.150918 | 0.92 | 15.51 |
| 6 <i>R</i> ,7 <i>S</i> ,10 <i>R</i> ,12 <i>S</i> - <b>2a3</b> |    | -1150.150572 | 1.14 | 10.75 |
| 6 <i>R</i> ,7 <i>S</i> ,10 <i>R</i> ,12 <i>R</i> - <b>2b1</b> |   | -1150.152390 | 0.00 | 64.97 |
| 6 <i>R</i> ,7 <i>S</i> ,10 <i>R</i> ,12 <i>R</i> - <b>2b2</b> |  | -1150.151340 | 0.66 | 21.37 |
| 6 <i>R</i> ,7 <i>S</i> ,10 <i>R</i> ,12 <i>R</i> - <b>2b3</b> |  | -1150.150918 | 0.92 | 13.67 |
| 6 <i>R</i> ,7 <i>S</i> ,10 <i>S</i> ,13 <i>S</i> - <b>3a1</b> |  | -1112.711345 | 0.00 | 57.40 |
| 6 <i>R</i> ,7 <i>S</i> ,10 <i>S</i> ,13 <i>S</i> - <b>3a2</b> |  | -1112.710118 | 0.77 | 15.65 |
| 6 <i>R</i> ,7 <i>S</i> ,10 <i>S</i> ,13 <i>S</i> - <b>3a3</b> |  | -1112.709880 | 0.92 | 12.16 |

---

---

|                                                               |                                                                                     |              |      |       |
|---------------------------------------------------------------|-------------------------------------------------------------------------------------|--------------|------|-------|
| 6 <i>R</i> ,7 <i>S</i> ,10 <i>S</i> ,13 <i>S</i> - <b>3a4</b> | 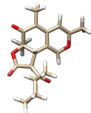   | -1112.709574 | 1.11 | 8.80  |
| 6 <i>R</i> ,7 <i>S</i> ,10 <i>S</i> ,13 <i>S</i> - <b>3a5</b> |    | -1112.709211 | 1.34 | 5.99  |
| 6 <i>R</i> ,7 <i>S</i> ,10 <i>S</i> ,13 <i>R</i> - <b>3b1</b> |    | -1112.711196 | 0.00 | 72.72 |
| 6 <i>R</i> ,7 <i>S</i> ,10 <i>S</i> ,13 <i>R</i> - <b>3b2</b> |    | -1112.709838 | 0.85 | 17.74 |
| 6 <i>R</i> ,7 <i>S</i> ,10 <i>S</i> ,13 <i>R</i> - <b>3b3</b> |    | -1112.709030 | 1.36 | 7.54  |
| 2 <i>R</i> ,6 <i>R</i> ,7 <i>S</i> ,12 <i>S</i> - <b>4a1</b>  |  | -962.638810  | 0.00 | 76.74 |
| 2 <i>R</i> ,6 <i>R</i> ,7 <i>S</i> ,12 <i>S</i> - <b>4a2</b>  |  | -962.636556  | 1.41 | 7.05  |
| 2 <i>R</i> ,6 <i>R</i> ,7 <i>S</i> ,12 <i>S</i> - <b>4a3</b>  |  | -962.635945  | 1.80 | 3.69  |
| 2 <i>R</i> ,6 <i>R</i> ,7 <i>S</i> ,12 <i>S</i> - <b>4a4</b>  |  | -962.635858  | 1.85 | 3.37  |
| 2 <i>R</i> ,6 <i>R</i> ,7 <i>S</i> ,12 <i>S</i> - <b>4a5</b>  |  | -962.635825  | 1.87 | 3.25  |
| 2 <i>R</i> ,6 <i>R</i> ,7 <i>S</i> ,12 <i>S</i> - <b>4a6</b>  |  | -962.635810  | 1.88 | 3.20  |

---

---

|                         |                                                                                     |             |      |       |
|-------------------------|-------------------------------------------------------------------------------------|-------------|------|-------|
| <i>2R,6R,7S,12S-4a7</i> | 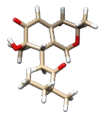   | -962.635650 | 1.98 | 2.70  |
| <i>2S,6R,7S,12S-4b1</i> |    | -962.639570 | 0.00 | 78.89 |
| <i>2S,6R,7S,12S-4b2</i> |    | -962.636873 | 1.69 | 4.48  |
| <i>2S,6R,7S,12S-4b3</i> |    | -962.636840 | 1.71 | 4.32  |
| <i>2S,6R,7S,12S-4b4</i> |   | -962.636800 | 1.74 | 4.15  |
| <i>2S,6R,7S,12S-4b5</i> |  | -962.636564 | 1.89 | 3.23  |
| <i>2S,6R,7S,12S-4b6</i> |  | -962.636491 | 1.93 | 2.99  |
| <i>2S,6R,7S,12S-4b7</i> |  | -962.636479 | 1.94 | 2.95  |
| <i>2R,6S,7R,12S-4c1</i> |  | -962.630461 | 0.00 | 39.79 |
| <i>2R,6S,7R,12S-4c2</i> |  | -962.629578 | 0.55 | 15.62 |
| <i>2R,6S,7R,12S-4c3</i> |  | -962.629418 | 0.65 | 13.19 |

---



---

|                                                      |                                                                                     |             |      |       |
|------------------------------------------------------|-------------------------------------------------------------------------------------|-------------|------|-------|
| 2 <i>R</i> ,6 <i>S</i> ,7 <i>R</i> ,12 <i>S</i> -4c4 | 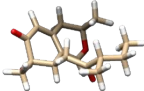   | -962.629356 | 0.69 | 12.35 |
| 2 <i>R</i> ,6 <i>S</i> ,7 <i>R</i> ,12 <i>S</i> -4c5 |    | -962.628459 | 1.26 | 4.78  |
| 2 <i>R</i> ,6 <i>S</i> ,7 <i>R</i> ,12 <i>S</i> -4c6 |    | -962.628449 | 1.26 | 4.73  |
| 2 <i>R</i> ,6 <i>S</i> ,7 <i>R</i> ,12 <i>S</i> -4c7 |    | -962.628204 | 1.42 | 3.65  |
| 2 <i>R</i> ,6 <i>S</i> ,7 <i>R</i> ,12 <i>S</i> -4c8 |    | -962.628173 | 1.44 | 3.53  |
| 2 <i>R</i> ,6 <i>S</i> ,7 <i>R</i> ,12 <i>S</i> -4c9 |  | -962.627797 | 1.67 | 2.37  |
| 2 <i>S</i> ,6 <i>S</i> ,7 <i>R</i> ,12 <i>S</i> -4d1 |  | -962.292042 | 0.00 | 36.89 |
| 2 <i>S</i> ,6 <i>S</i> ,7 <i>R</i> ,12 <i>S</i> -4d2 |  | -962.291891 | 0.09 | 31.44 |
| 2 <i>S</i> ,6 <i>S</i> ,7 <i>R</i> ,12 <i>S</i> -4d3 |  | -962.291296 | 0.47 | 16.74 |
| 2 <i>S</i> ,6 <i>S</i> ,7 <i>R</i> ,12 <i>S</i> -4d4 |  | -962.290597 | 0.91 | 7.98  |
| 2 <i>S</i> ,6 <i>S</i> ,7 <i>R</i> ,12 <i>S</i> -4d5 |  | -962.290110 | 1.21 | 4.77  |

---

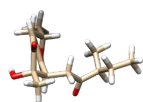

-962.289373

1.67

2.18

|      | <b>1a</b> |       |      | <b>1b</b> |       |      | <b>2a</b> |       |      | <b>2b</b> |       |      |
|------|-----------|-------|------|-----------|-------|------|-----------|-------|------|-----------|-------|------|
|      | DP4+      | TAD   | MAE  |
| H    | 99.91%    | 3.32  | 0.24 | 0.09%     | 4.63  | 0.36 | 100.0%    | 1.65  | 0.13 | 0.0%      | 4.24  | 0.33 |
| C    | 100%      | 51.71 | 2.72 | 0.0%      | 51.37 | 2.70 | 68.74%    | 54.27 | 2.86 | 31.26%    | 56.03 | 2.95 |
| Both | 100%      | 55.03 | 2.96 | 0.0%      | 56.00 | 3.06 | 100%      | 55.92 | 2.99 | 0.0%      | 60.27 | 3.28 |

**Figure S37** NMR calculation results of **1** and **2**.

DP4<sup>+</sup> probability (sarotti-nmr.weebly.com), total absolute deviation (TAD), and mean absolute error (MAE) analysis for four candidate diastereomers, **1a/1b** and **2a/2b** (PCM/B3LYP/6-31+G (d,p) level).

-----  
 SUMMARY OF ISOTROPIC COUPLING CONSTANTS (Hz)  
 -----

|      | 25 H         | 26 H   | 27 H   | 28 H   | 29 H    | 30 H    |
|------|--------------|--------|--------|--------|---------|---------|
| 25 H | 0.000        | 0.428  | -3.104 | 0.075  | 0.000   | 0.000   |
| 26 H | 0.428        | 0.000  | 0.000  | -0.329 | 0.039   | 0.000   |
| 27 H | -3.104       | 0.000  | 0.000  | 0.430  | 0.000   | 0.043   |
| 28 H | 0.075        | -0.329 | 0.430  | 0.000  | 0.272   | -1.401  |
| 29 H | 0.000        | 0.039  | 0.000  | 0.272  | 0.000   | -15.497 |
| 30 H | 0.000        | 0.000  | 0.043  | -1.401 | -15.497 | 0.000   |
| 31 H | 0.000        | 0.000  | 0.074  | -1.591 | -15.713 | -19.445 |
| 32 H | -0.006       | -0.057 | -0.015 | 0.012  | 0.000   | 0.000   |
| 33 H | -0.498       | 0.000  | 0.014  | 0.000  | 0.000   | 0.000   |
| 34 H | 2.327        | 0.179  | 0.000  | 0.000  | 0.000   | 0.000   |
| 35 H | -0.088       | 0.030  | 0.000  | 0.000  | 0.000   | 0.000   |
| 36 H | <b>6.439</b> | 0.000  | -0.277 | 0.000  | 0.000   | 0.000   |
| 37 H | 0.086        | 0.000  | 0.058  | 0.000  | 0.000   | 0.000   |
| 38 H | 0.000        | 0.000  | 0.138  | 0.000  | 0.000   | 0.000   |
| 39 H | 0.033        | 0.000  | 0.077  | 0.000  | 0.000   | 0.000   |
| 40 H | 0.000        | 0.000  | 0.041  | 0.000  | 0.000   | 0.000   |
| 41 H | 0.000        | 0.000  | 0.040  | 0.000  | 0.000   | 0.000   |
| 42 H | 0.000        | 0.000  | 0.000  | 0.000  | 0.000   | 0.000   |
| 43 H | 0.000        | 0.000  | 0.000  | 0.000  | 0.000   | 0.000   |
| 44 H | 0.000        | 0.000  | 0.000  | 0.000  | 0.000   | 0.000   |
| 45 H | 0.000        | 0.000  | 0.001  | 0.000  | 0.000   | 0.000   |
| 46 H | 0.000        | 0.000  | 0.000  | 0.000  | 0.000   | 0.000   |
| 47 H | 0.000        | 0.000  | 0.000  | 0.000  | 0.000   | 0.000   |
| 48 H | -0.069       | 0.000  | 0.000  | 0.000  | 0.000   | 0.000   |

**Figure S38** Calculation results of the spin-spin coupling constants of **1**.

“25 H” and “36 H” corresponds respectively to H-7 and H-10 in the structure of **1**. (B972/pcJ-1 level). (*J. Chem. Theory Comput.* 2017, 13, 11, 5231–5239)

| SUMMARY OF ISOTROPIC COUPLING CONSTANTS (Hz) |        |        |        |        |         |         |
|----------------------------------------------|--------|--------|--------|--------|---------|---------|
|                                              | 25 H   | 26 H   | 27 H   | 28 H   | 29 H    | 30 H    |
| 25 H                                         | 0.000  | 0.411  | -2.851 | 0.070  | 0.000   | 0.000   |
| 26 H                                         | 0.411  | 0.000  | 0.000  | -0.273 | 0.042   | 0.000   |
| 27 H                                         | -2.851 | 0.000  | 0.000  | 0.416  | 0.000   | 0.032   |
| 28 H                                         | 0.070  | -0.273 | 0.416  | 0.000  | 0.292   | -1.286  |
| 29 H                                         | 0.000  | 0.042  | 0.000  | 0.292  | 0.000   | -15.489 |
| 30 H                                         | 0.000  | 0.000  | 0.032  | -1.286 | -15.489 | 0.000   |
| 31 H                                         | 0.000  | 0.000  | 0.099  | -1.705 | -15.656 | -19.293 |
| 32 H                                         | -0.672 | 0.075  | -0.028 | 0.029  | 0.000   | 0.000   |
| 33 H                                         | -0.140 | 0.445  | 0.052  | 0.000  | 0.000   | 0.000   |
| 34 H                                         | -2.928 | -0.021 | 0.000  | 0.000  | 0.000   | 0.000   |
| 35 H                                         | 0.064  | -0.025 | 0.000  | 0.000  | 0.000   | 0.000   |
| 36 H                                         | 2.610  | 0.000  | -0.498 | 0.000  | 0.000   | 0.000   |
| 37 H                                         | 0.298  | 0.000  | 0.094  | 0.000  | 0.000   | 0.000   |
| 38 H                                         | 0.000  | 0.000  | 0.000  | 0.000  | 0.000   | 0.000   |
| 39 H                                         | 0.000  | 0.000  | 0.141  | 0.000  | 0.000   | 0.000   |
| 40 H                                         | 0.000  | 0.000  | 0.000  | 0.000  | 0.000   | 0.000   |
| 41 H                                         | 0.000  | 0.000  | 0.000  | 0.000  | 0.000   | 0.000   |
| 42 H                                         | 0.000  | 0.000  | 0.000  | 0.000  | 0.000   | 0.000   |
| 43 H                                         | 0.000  | 0.000  | 0.000  | 0.000  | 0.000   | 0.000   |
| 44 H                                         | 0.000  | 0.000  | 0.000  | 0.000  | 0.000   | 0.000   |
| 45 H                                         | 0.000  | 0.000  | 0.000  | 0.000  | 0.000   | 0.000   |
| 46 H                                         | 0.012  | 0.000  | 0.000  | 0.000  | 0.000   | 0.000   |
| 47 H                                         | 0.269  | 0.000  | 0.000  | 0.000  | 0.000   | 0.000   |
| 48 H                                         | -0.003 | 0.000  | 0.000  | 0.000  | 0.000   | 0.000   |

**Figure S39 Calculation results of the spin-spin coupling constants of 2.**

“25 H” and “36 H” corresponds respectively to H-7 and H-10 in the structure of **2**. (B972/pcJ-1 level). (*J. Chem. Theory Comput.* 2017, 13, 11, 5231–5239)
